# Supplementary material for: Effects of Major Families of Modulators on Performances and Gastrointestinal Microbiota of Poultry, Pigs and Ruminants: A Systematic Approach
Source: Microorganisms. 2023 May 31;11(6):1464. doi: 10.3390/microorganisms11061464 (PMC10300821; doi:10.3390/microorganisms11061464)
Supplement: Supplementary file 1 [file microorganisms-11-01464-s001.zip › Supplementary Data S1.pdf]

## Supplemental Data S1: Effect of Modulators on Intestinal Microbiota and Phenotype of Poultry

*Table S1: Effect of probiotics on the phenotype and gastro-intestinal microbiota of poultry*

| Ref               | Intervention                                               | Conditions                                                                 | Methods                                                                                                                                | Phenotype     |             |            | Immunity                                                                                                                      | Microbiota                           |                                                 |                                            |                                                                                                   |
|-------------------|------------------------------------------------------------|----------------------------------------------------------------------------|----------------------------------------------------------------------------------------------------------------------------------------|---------------|-------------|------------|-------------------------------------------------------------------------------------------------------------------------------|--------------------------------------|-------------------------------------------------|--------------------------------------------|---------------------------------------------------------------------------------------------------|
|                   |                                                            |                                                                            |                                                                                                                                        | Weight        | Food intake | FCR or FCE |                                                                                                                               | Diversity                            | Lactic acid-producing bacteria                  | SCFA-producing bacteria                    | Pathogenic and/or Zoonotic bacteria                                                               |
| Rodjan 2017       | <i>Bacillus</i>                                            | Ross 308 broiler chickens<br>Male and Female<br>Healthy                    | <i>Bacillus</i> (5.10 <sup>11</sup> CFU/kg of diet)<br>5 weeks<br>Culture                                                              | =             | =           | =          | ND                                                                                                                            | ND                                   | Ileum and Cecum:<br>= Lactobacillus             | ND                                         | Ileum and Cecum:<br>↓ E.coli                                                                      |
| Cao 2018          | <i>Bacillus Amyloliquefaciens</i>                          | Ross 308 broiler chickens<br>Gender ND<br>Healthy                          | <i>Bacillus</i> (10 <sup>9</sup> CFU/ kg of diet)<br>6 weeks<br>Sequencing                                                             | ↑ BW<br>↑ BWG | ND          | ↓ FCR      | ND                                                                                                                            | ND                                   | Cecum:<br>= Lactobacillus                       | Caecum:<br>↑ Faecalibacterium<br>↑ Blautia | ND                                                                                                |
| Xing 2015         | <i>Bacillus Subtilis</i>                                   | Linwu ducklings<br>Female<br>Healthy                                       | <i>Bacillus</i> (5.10 <sup>8</sup> or 5.10 <sup>10</sup> CFU /kg of diet)<br>9 weeks<br>RTqPCR                                         | ND            | ND          | ND         | Jejunum:<br>↑ INFy mRNA levels<br>↓ IL-1β, IL-2, IL-10, IL-18 mRNA levels<br>Ileum:<br>↓ IL-1β, IL-2, IL-10, IL-8 mRNA levels | ND                                   | Caecum:<br>↑ Lactobacillus<br>= Bifidobacterium | Caecum:<br>↑ Megasphaera elsdenii          | Cecum:<br>= E.coli                                                                                |
| Jeong 2014        | <i>Bacillus Subtilis</i>                                   | Ross 308 broiler chickens<br>Male<br>Healthy                               | <i>Bacillus</i> (3.10 <sup>8</sup> or 6.10 <sup>8</sup> CFU/kg of diet)<br>5 weeks<br>Culture                                          | ↑ ADG         | =           | ↓ FCR      | ND                                                                                                                            | ND                                   | Ileum, Cecum and feces:<br>↑ Lactobacillus      | ND                                         | Cecum and Feces:<br>↓ E.coli<br>Cecum, Ileum, Colon and Feces:<br>↓ Salmonella<br>= C.perfringens |
| Pereira 2018      | <i>Bacillus Subtilis</i>                                   | Cobb 500 broiler chickens<br>Male<br>Healthy                               | <i>Bacillus</i> (3.10 <sup>7</sup> CFU/kg of diet)<br>6 weeks<br>Sequencing                                                            | =             | =           | =          | ND                                                                                                                            | ↓ α-diversity and richness           | Small intestine:<br>↑ Lactobacillus             | Small intestine:<br>↓ Faecalibacterium     | ND                                                                                                |
| Chen 2013         | <i>Bacillus Subtilis</i> + <i>Saccharomyces cerevisiae</i> | Landes geese<br>Male<br>Healthy                                            | <i>Bacillus</i> (10 <sup>9</sup> CFU/kg of diet)<br>3 weeks<br>Culture                                                                 | ↑ BWG         | ↑           | =          | ↑ [GPx] in heart and liver<br>↑ [SOD] in meat<br>↓ [MDA] in heart, liver and meat                                             | ND                                   | Large and small intestine:<br>↑ Lactobacillus   | ND                                         | Small and Large intestine:<br>↓ E.coli                                                            |
| Han 2013          | <i>Enterococcus faecalis</i>                               | Arbor Acres broiler chickens<br>Male and Female<br>Healthy                 | <i>Enterococcus</i> (10 <sup>9</sup> .10 <sup>10</sup> or 10 <sup>11</sup> CFU/kg of diet)<br>6 weeks<br>RTqPCR                        | ↑ BW<br>↑ ADG | =           | ↓ FCR      | ↓ [MDA] in plasma                                                                                                             | = α-diversity, evenness and richness | Feces:<br>↑ Lactobacillus<br>↑ Bifidobacterium  | ND                                         | Cecum:<br>= E.coli                                                                                |
| Yang 2012         | <i>Clostridium butyricum</i>                               | Lignan yellow broiler chicken<br>Male<br>Healthy                           | <i>Clostridium</i> (1 to 3 10 <sup>7</sup> CFU/kg of diet)<br>6 weeks<br>Culture                                                       | ↑ BW<br>↑ ADG | ND          | ND         | ↑ [IgA] [IgG] and [IgM] in serum                                                                                              | ND                                   | Cecum:<br>↑ Lactobacillus<br>↑ Bifidobacterium  | ND                                         | Cecum:<br>↓ E.coli<br>↓ Salmonella<br>↓ C.perfringens                                             |
| Vase-Khavari 2018 | Superzist                                                  | Ross 308 broiler chickens<br>Gender ND<br>Healthy                          | Superzist (0.03% w/v of diet)<br>6 weeks<br>Culture                                                                                    | =             | =           | =          | ↑ [Lymphocyte] in plasma                                                                                                      | ND                                   | Cecum:<br>= Lactobacillus                       | ND                                         | Cecum:<br>= E.coli                                                                                |
| Attebury 2011     | <i>Bdellovibrio Bacteriovorus</i>                          | Hy-line Brown chicken<br>Male<br>Healthy                                   | <i>Bdellovibrio</i> (1.9 10 <sup>7</sup> PFU/mL ; 100μL/animal/day)                                                                    | ND            | ND          | ND         | ND                                                                                                                            | ND                                   | Cecum:<br>↓ Lactobacillus<br>= Bifidobacterium  | ND                                         | ND                                                                                                |
|                   |                                                            | Hy-line Brown chicken<br>Male<br>S. Enteriditis inoculation                | Salmonella (3.16 10 <sup>7</sup> CFU/animal)<br>4 weeks<br>Culture                                                                     | ND            | ND          | ND         | ND                                                                                                                            | ND                                   | ND                                              | ND                                         | Cecum:<br>↓ Salmonella                                                                            |
| Wang 2021 bis     | <i>Lactobacillus salivarius</i>                            | White leghorn chicken<br>Gender ND<br>Mycoplasma gallisepticum inoculation | <i>Lactobacillus</i> (5.10 <sup>7</sup> CFU/animal/day)<br>Mycoplasma (10 <sup>9</sup> CCU/mL ; 0.2 mL/animal)<br>1 week<br>Sequencing | ND            | ND          | ND         | ND                                                                                                                            | ↑ α-diversity                        | ND                                              | ND                                         | Feces:<br>↓ E.coli                                                                                |

*Table S2: Effect of zoonotic/pathogenic bacteria on the phenotype and gastro-intestinal microbiota of poultry*

| Ref             | Intervention                    | Conditions                           | Methods                                                                                                           | Phenotype     |             |            |                                                | Immunity                                                                                       | Intestinal barrier                                                                              | Microbiota                                                             |                                                                                |                                                     |                                                                                      |
|-----------------|---------------------------------|--------------------------------------|-------------------------------------------------------------------------------------------------------------------|---------------|-------------|------------|------------------------------------------------|------------------------------------------------------------------------------------------------|-------------------------------------------------------------------------------------------------|------------------------------------------------------------------------|--------------------------------------------------------------------------------|-----------------------------------------------------|--------------------------------------------------------------------------------------|
|                 |                                 |                                      |                                                                                                                   | Weight        | Food intake | FCR or FCE | Villi structure                                |                                                                                                |                                                                                                 | Diversity                                                              | Phylum                                                                         | Lactic acid-producing bacteria                      | Pathogens                                                                            |
| Yang 2019       | <i>C. perfringens</i>           |                                      |                                                                                                                   | ND            | ND          | ND         | ND                                             | ND                                                                                             | ND                                                                                              | Jejunum and Cecum: = $\alpha$ -diversity                               | Jejunum: ↓ Cyanobacteria<br>↓ Bacteroidetes<br>↑ Proteobacteria                | Jejunum: ↓ Lactobacillus<br>Caecum: = Lactobacillus | Jejunum and Cecum: = Escherichia shigella<br>= Clostridium-sensus stricto 1          |
|                 | Eimera                          | Cobb broiler chicken Male and Female | Infection (2.5 10 <sup>8</sup> CFU/mL ; 3mL/animal) 3 weeks Sequencing                                            | ND            | ND          | ND         | ND                                             | ND                                                                                             | ND                                                                                              | Jejunum and Cecum: = $\alpha$ -diversity                               | Jejunum: ↓ Firmicutes<br>↓ Bacteroidetes<br>↑ Cyanobacteria                    | Jejunum: = Lactobacillus<br>Caecum: = Lactobacillus | Jejunum and Cecum: = Escherichia shigella<br>= Clostridium-sensus stricto 1          |
|                 | <i>C.perfringens</i> + Eimera   |                                      |                                                                                                                   | ND            | ND          | ND         | ND                                             | ND                                                                                             | ND                                                                                              | Jejunum: ↓ $\alpha$ -diversity<br>Caecum: = alpha diversity            | Jejunum: ↓ Cyanobacteria<br>↓ Actinobacteria<br>↑ Proteobacteria               | Jejunum: = Lactobacillus<br>Caecum: = Lactobacillus | Jejunum and Cecum: = Escherichia shigella<br>Jejunum: ↑ Clostridium-sensus stricto 1 |
| Kim 2015        | <i>C.perfringens</i> + E.maxima | Ross 308 broiler chickens Male       | <i>C.perfringens</i> (10 <sup>9</sup> CFU/animal)<br>E.maxima (10 <sup>4</sup> oocysts/animal) 3 weeks Sequencing | ↓ BW          | ND          | ND         | ND                                             | ND                                                                                             | ND                                                                                              | ND                                                                     | ND                                                                             | Ileum: ↓ Lactobacillus                              | ND                                                                                   |
|                 |                                 | Cobb 500 broiler chickens Male       |                                                                                                                   | ↓ BW          | ND          | ND         | ND                                             | ND                                                                                             | ND                                                                                              | ND                                                                     | ND                                                                             | Ileum: ↑ Lactobacillus                              | ND                                                                                   |
|                 |                                 | Hubbard broiler chickens Male        |                                                                                                                   | ↓ BW          | ND          | ND         | ND                                             | ND                                                                                             | ND                                                                                              | ND                                                                     | ND                                                                             | Ileum: ↓ Lactobacillus                              | ND                                                                                   |
| Yang 2008       | <i>E.coli</i>                   | Cobb 500 broiler chickens Male       | E.coli (10 <sup>7</sup> CFU/ml ; 1mL/animal then 10 <sup>5</sup> CFU/mL of water) 3 weeks Culture                 | = BW          | ↑           | ↑ FCR      | ND                                             | ND                                                                                             | ND                                                                                              | ND                                                                     | ND                                                                             | Ileum: ↑ Lactobacillus                              | ND                                                                                   |
| Daneshmand 2019 | <i>E.coli</i>                   | Cobb broiler chicken Male            | <i>E.coli</i> (10 <sup>8</sup> CFU/animal) 3 weeks Culture                                                        | ↓ ADG         | =           | ↑ FCR      | Jejunum: ↓ VH, VW and VSA = CD and VH/CD ratio | Jejunum: ↑ [IL-2]<br>↓ [IL-6]                                                                  | Jejunum: ↓ [Claudin-1] and [Occludin]<br>↑ [MUC2]                                               | ND                                                                     | ND                                                                             | Ileum: ↓ Lactobacillus<br>↓ Bifidobacterium         | Ileum: ↑ E.coli                                                                      |
| Shao 2014       | <i>Salmonella thyphimurium</i>  | Cobb 500 broiler chicken Male        | <i>Salmonella</i> (109 CFU/mL ; 0.8 mL/bird) 2 or 6 weeks RTqPCR                                                  | ↓ BW          | =           | =          | Ileum: = VH = CD<br>↓ VH/CD ratio              | ND                                                                                             | ND                                                                                              | Ileum: ↓ $\alpha$ -diversity = richness                                | ND                                                                             | Ileum: ↓ Lactobacillus = Enterococcus               | Ileum: ↑ Salmonella Typhimurium                                                      |
| Wang 2021       | <i>Salmonella pullorum</i>      | Dward chicken Male                   | <i>Salmonella</i> (8.4510 <sup>8</sup> CFU/mL ; 0.2 mL/bird) 11 days Culture                                      | ↓ BW<br>↓ ADG | ↓           | =          | Ileum: ↓ VH and regularity                     | Cecum: ↓ [IgA] = [IL-4]<br>↑ [TNF $\alpha$ ]<br>↑ [INF $\gamma$ ]<br>↑ Lymphocyte infiltration | ND                                                                                              | ND                                                                     | ND                                                                             | Cecum: ↓ Lactobacillus                              | Cecum: ↑ E.coli<br>↑ Salmonella                                                      |
| Fernandez 2002  | <i>Salmonella enteritidis</i>   | Isa-brown laying hens Female         | <i>Salmonella</i> (510 <sup>4</sup> CFU/mL) 4 weeks Culture                                                       | ND            | ND          | ND         | ND                                             | ND                                                                                             | ND                                                                                              | ND                                                                     | ND                                                                             | Cecum: = Lactobacillus = Enterococcus               | Cecum: ↑ Salmonella enteritidis                                                      |
| Wang 2021 bis   | <i>Mycoplasma gallispeticum</i> | White Leghorn Chicken                | <i>Mycoplasma</i> (10 <sup>9</sup> CFU/mL ; 0.2 mL/bird) 1 week Sequencing                                        | ND            | ND          | ND         | ND                                             | Ileum: ↓ [SIgA]<br>↓ Muc2 mRNA                                                                 | Ileum: ↓ transepitheliale electrical reistance<br>↑ FD4 flux<br>↓ Claudine-1, Occludin and ZO-1 | Feces: ↓ $\alpha$ -diversity<br>Modification of the $\beta$ -diversity | Feces: ↑ Firmicutes<br>↑ Proteobacteria<br>↓ Bacteroidetes<br>↓ Actinobacteria | ND                                                  | Feces: ↑ E.coli                                                                      |

*Table S3: Effect of probiotics combined with another nutritional intervention on the phenotype and gastro-intestinal microbiota of poultry*

| Ref         | Probiotic                                           | Intervention                                                                                                                          | Conditions                                              | Methods                                                                                                     | Phenotype     |             |            |                                       | Immunity                                                                 | Microbiota                                   |                                                |                                     |
|-------------|-----------------------------------------------------|---------------------------------------------------------------------------------------------------------------------------------------|---------------------------------------------------------|-------------------------------------------------------------------------------------------------------------|---------------|-------------|------------|---------------------------------------|--------------------------------------------------------------------------|----------------------------------------------|------------------------------------------------|-------------------------------------|
|             |                                                     |                                                                                                                                       |                                                         |                                                                                                             | Weight        | Food intake | FCR or FCE | Villi structure                       |                                                                          | Diversity                                    | Lactic acid-producing bacteria                 | Pathogenic and/or Zoonotic bacteria |
| Rodjan 2017 | <i>Bacillus</i>                                     | <u>Organic acids:</u><br>Fummaric acid + Formic acid + Lactic acid + Propionic acid + Citric acid                                     | Ross 308 broiler chickens<br>Male and Female<br>Healthy | <i>Bacillus</i> (5.10 <sup>11</sup> CFU/kg of diet)<br>Organic acids (2g /kg of diet)<br>5 weeks<br>Culture | =             | =           | =          | Duodenum:<br>= VH, CD and VH/CD ratio | ND                                                                       | ND                                           | Ileum and Cecum<br>= Lactobacillus             | Ileum and Cecum:<br>↓ E.coli        |
| Wang 2021   | <i>Lactobacillus paracasei</i> and <i>Plantarum</i> | <u>Fermented herbs:</u><br>Astragalus + P. notoginseng + Licorice + Chickpeas + Black bean powder + Glucose +                         | Dward chicken Male<br>Healthy                           | <i>Lactobacillus</i> (1.2 10 <sup>9</sup> CFU/mL ; 0.2 mL/animal)<br>Herbs (10% in water)                   | ↑ BW<br>↑ ADG | ↑           | =          | = (Ileum)                             | Cecum:<br>= IgA and IL-4<br>↓ Lymphocyte infiltration<br>↓ TNFα and INFγ | ND                                           | Cecum:<br>↑ Lactobacillus                      | Cecum:<br>↓ E.coli<br>↓ Salmonella  |
|             |                                                     |                                                                                                                                       | Dward chicken Male<br><i>Salmonella pullorum</i>        | <i>Salmonella</i> (8.45 10 <sup>8</sup> CFU/mL ; 0.2mL/animal)<br>11 days<br>Culture                        | ↑ BW<br>↑ ADG | ↑           | =          | Ileum:<br>↑ VH and regularity         | Cecum:<br>↑ IgA and IL-4<br>↓ TNFα<br>= Lymphocyte infiltration          | ND                                           | Cecum:<br>↑ Lactobacillus                      | Cecum:<br>↓ E.coli<br>↓ Salmonella  |
| Huang 2020  | <i>Bacillus licheniformis</i>                       | <u>Fermented herbs:</u><br>Codonopsis Radix, Astragali Radix, Radix Glycyrrhizae, Poria, Edicated Leaven, Malt, Cra taegu, Areca Seed | Arbor acre plus broiler chicken Male<br>Healthy         | Fermented Herbs by probiotic (20 mg/kg of diet)<br>6 weeks<br>Sequencing                                    | =             | =           | =          | ND                                    | ND                                                                       | = (Fogut)                                    | Forgut<br>= Lactobacillus<br>= Bifidobacterium | ND                                  |
|             | <i>Bacillus subtilis</i>                            |                                                                                                                                       |                                                         |                                                                                                             | =             | =           | =          | ND                                    | ND                                                                       | = (Fogut)                                    | Forgut<br>= Lactobacillus<br>= Bifidobacterium | ND                                  |
|             | <i>Saccharomyces cerevisiae</i> stain 1             |                                                                                                                                       |                                                         |                                                                                                             | =             | =           | =          | ND                                    | ND                                                                       | = (Fogut)                                    | Forgut<br>= Lactobacillus<br>= Bifidobacterium | ND                                  |
|             | <i>Zygosaccharomyces rouxii</i>                     |                                                                                                                                       |                                                         |                                                                                                             | =             | =           | =          | ND                                    | ND                                                                       | = (Fogut)                                    | Forgut<br>↓ Lactobacillus<br>↑ Bifidobacterium | ND                                  |
|             | <i>Saccharomyces cerevisiae</i> strain 2            |                                                                                                                                       |                                                         |                                                                                                             | =             | =           | =          | ND                                    | ND                                                                       | = (Fogut)                                    | Forgut<br>= Lactobacillus<br>= Bifidobacterium | ND                                  |
| Chen 2021   | <i>Bacillus subtilis</i>                            | <u>Fermented product</u>                                                                                                              | Ross 308 broiler chicken Male<br>LPS challenge          | <i>Bacillus</i> (2 or 6 10 <sup>10</sup> CFU/kg of diet)<br>LPS (5mg/kg of BW)<br>3 weeks<br>Sequencing     | =             | =           | =          | ND                                    | ↓ IL-6, IL-1β (duodenum, jejunum and Ileum)                              | ↓ α-diversity<br>Modification of β-diversity | Cecum<br>= Lactobacillus<br>= Bifidobacterium  | ND                                  |

Table S4: Effect of synbiotics on the phenotype and gastro-intestinal microbiota of poultry

| Ref              | Probiotic                         | Prebiotic | Conditions                                             | Methods                                                                          | Phenotype |             |            |                                         | Immunity                   | Intestinal barrier | Microbiota                                                                 |                      |                                                    |
|------------------|-----------------------------------|-----------|--------------------------------------------------------|----------------------------------------------------------------------------------|-----------|-------------|------------|-----------------------------------------|----------------------------|--------------------|----------------------------------------------------------------------------|----------------------|----------------------------------------------------|
|                  |                                   |           |                                                        |                                                                                  | Weight    | Food intake | FCR or FCE | Villi structure                         |                            |                    | Lactic acid-producing bacteria                                             | AGCC                 | Pathogenic and/or Zoonotic bacteria                |
| Vineetha 2016    | <i>Lactobacillus plantarum</i>    | MOS       | Aribro Dhanraja broiler chicken Healthy                | Probiotic (10 <sup>8</sup> CFU/g of fermented diet)                              | =         | =           | =          | Duodenum<br>↑VH<br>↑CD<br>= VH/CD ratio | ND                         | ND                 | Crop and Ileum:<br>↑ Lactobacillus                                         | ND                   | Crop, Ileum and Cecum:<br>↓ E.coli<br>↓ Salmonella |
|                  | <i>Lactobacillus acidophilus</i>  |           |                                                        | Prebiotic (1g/kg of diet)<br>5 weeks Culture                                     | =         | =           | =          | Duodenum<br>↑VH<br>↑CD<br>= VH/CD ratio | ND                         | ND                 | Crop, Ileum and Cecum:<br>↑ Lactobacillus                                  | ND                   | Crop, Ileum and Cecum:<br>↓ E.coli<br>↓ Salmonella |
| Markazi 2018     | Poultrystar ®                     |           | White Leghorn Chicken<br><i>Salmonella enteritidis</i> | Synbiotic (20 mg/day) Salmonella (10 <sup>9</sup> CFU/animal)<br>29 weeks RTqPCR | =         | ND          | ND         | = VH (jejunum)                          | Bile and plasma :<br>↑ IgA | ND                 | Cecum:<br>↑ Lactobacillus<br>↑ Bifidobacterium<br>↑ Pediococcus acidilacti | ND                   | Cecum:<br>↓ Salmonella                             |
| Mountzouris 2019 | Poultrystar ®                     |           | Cobb broiler chicken Male Healthy                      | Synbiotic (1g/kg of diet)<br>6 weeks RTqPCR                                      | ND        | ND          | ND         | ND                                      | = (Ileum)                  | = (Ileum)          | Ileum and Cecum:<br>= Lactobacillus<br>= Bifidobacterium                   | = (Ileum and Caecum) | Ileum and Cecum:<br>= E.coli<br>= C.perfringens    |
|                  | Thermal inactivated Poultrystar ® |           |                                                        |                                                                                  | ND        | ND          | ND         | ND                                      | = (Ileum)                  | = (Ileum)          | Ileum and Cecum:<br>= Lactobacillus<br>= Bifidobacterium                   | = (Ileum and Caecum) | Ileum and Cecum:<br>= E.coli<br>= C.perfringens    |

*Table S5: Effect of postbiotics on the phenotype and gastro-intestinal microbiota of poultry*

| Ref             | Intervention                                                             | Conditions                                              | Methods                                              | Phenotype      |             |            |                       | Microbiota                                            |                                                        |           |                                                                               |                                     |
|-----------------|--------------------------------------------------------------------------|---------------------------------------------------------|------------------------------------------------------|----------------|-------------|------------|-----------------------|-------------------------------------------------------|--------------------------------------------------------|-----------|-------------------------------------------------------------------------------|-------------------------------------|
|                 |                                                                          |                                                         |                                                      | Weight         | Food intake | FCR or FCE | Villi structure       | Lactic acid-producing bacteria                        | SCFA-producing bacteria                                | pH        | AGCC                                                                          | Pathogenic and/or Zoonotic bacteria |
| Rodjan 2017     | Fummaric acid + Formic acid + Lactic acid + Propionic acid + Citric acid | Ross 308 broiler chickens<br>Male and Female<br>Healthy | Organic acids (2g /kg of diet)<br>5 weeks<br>Culture | =              | =           | =          | = (Duodenum)          | Ileum and Cecum:<br>= Lactobacillus                   | ND                                                     | ND        | ND                                                                            | ↓ E.coli (Ileum and Caecum)         |
| Nava 2009       | HLP: Batanoic, Lactic and Phosphoric acid                                | Cobb broiler chickens<br>Male<br>Healthy                | HLP ( 0.0525% of water)<br>4 weeks<br>RTqPCR         | =              | =           | =          | ND                    | Ileum:<br>= Lactobacillus                             | ND                                                     | ND        | ND                                                                            | ND                                  |
|                 | HFP: Butanoic, Formic and Propionic acid                                 |                                                         | HFP ( 0.0525% of water)<br>4 weeks<br>RTqPCR         | =              | =           | =          | ND                    | Ileum:<br>↑ Lactobacillus                             | ND                                                     | ND        | ND                                                                            | ND                                  |
| Czerwinski 2012 | Sodium Butyrate                                                          | Ross 308 broiler chickens<br>Female<br>Healthy          | SB (300 mg/kg of diet)<br>4 weeks<br>FISH probing    | =              | =           | =          | = (Jejunum and Ileum) | Ileum and Cecum:<br>= Lactobacillus<br>= Enterococcus | ND                                                     | ↑ (Ileum) | Ileum:<br>↑ [Propionate]<br>↑ [Isobutyrate]<br>= [Acetate]<br>= [Lactic acid] | ND                                  |
| Feng 2021       | Monobutyrin                                                              | Qingyan Partridge broilers<br>Female<br>Healthy         | MB (250 mg/kg of diet)<br>8 weeks<br>Sequencing      | ↑ (Egg weight) | ND          | ND         | ND                    | Cecum:<br>= Lactobacillus                             | Cecum:<br>= Faecalibacterium,<br>Phascolarctobacterium | ND        | ND                                                                            | ND                                  |

*Table S6: Effect of prebiotics on the phenotype and gastro-intestinal microbiota of poultry*

| Ref               | Intervention | Conditions                                                | Methods                                             | Phenotype               |             |            |                                        | Microbiota                                                        |                           |                                                                       |                                                                      |
|-------------------|--------------|-----------------------------------------------------------|-----------------------------------------------------|-------------------------|-------------|------------|----------------------------------------|-------------------------------------------------------------------|---------------------------|-----------------------------------------------------------------------|----------------------------------------------------------------------|
|                   |              |                                                           |                                                     | Weight                  | Food intake | FCR or FCE | Villi structure                        | Lactic acid-producing bacteria                                    | pH                        | SCFA                                                                  | Pathogenic and/or Zoonotic bacteria                                  |
| Peinado 2013      | Inulin       | Cobb broilers chickens<br>Male<br>Healthy                 | Inulin (20g/kg of diet)<br>3 weeks<br>RTqPCR        | =                       | =           | =          | Ileum<br>↑ VH<br>= CD<br>↑ VH/CD ratio | Crop, Ileum and Cecum:<br>↓ Lactobacillus<br>= Bifidobacterium    | = (crop)                  | ND                                                                    | Crop, Ileum and Cecum:<br>= Escherichia-shigella<br>= Enterobacteria |
| Dias 2019         | Inulin       | Cornish Cross broiler<br>Male and Female<br>Healthy       | Inulin (40mg per egg)<br>3 weeks<br>RTqPCR          | =                       | ND          | ND         | ND                                     | Cecum:<br>↑ Lactobacillus<br>↑ Bifidobacterium                    | ND                        | ND                                                                    | Caecum:<br>↑ E.coli                                                  |
| Kulshreshtha 2014 | Inulin       | Lohmann Brown Classic Laying Hens<br>Female<br>Healthy    | Inulin (2% of diet)<br>4 weeks<br>RTqPCR            | =                       | =           | =          | = (ileum)                              | Ileum:<br>↑ Lactobacillus acidophilus<br>= Bifidobacterium Longum | ND                        | Cecum:<br>↑ [i-butyric acid] = [acetate], [propionate] and [butyrate] | Ileum:<br>↓ C.perfringens                                            |
| Rebolé 2010       | Inulin       | Cobb broilers chickens<br>Male<br>Healthy                 | Inulin (10 or 20g of diet)<br>5 weeks<br>Culture    | =                       | =           | =          | = (jejunum)                            | Ileum and Cecum:<br>↑ Lactobacillus<br>↑ Bifidobacterium          | = (cecum)                 | Cecum:<br>= [acetate], [propionate] and [butyrate]                    | ND                                                                   |
| Shang 2010        | Inulin       | Brown nick laying hens<br>Female<br>Healthy               | Inulin (0.1 to 2% of diet)<br>4 weeks<br>Culture    | ND                      | =           | =          | ND                                     | Cecum:<br>= Lactobacillus<br>↑ Bifidobacterium                    | ↓ (cecum)                 | ND                                                                    | ND                                                                   |
| Xia 2019          | Inulin       | Tegek broiler chickens<br>Male<br>Healthy                 | Inulin (1 to 4% of diet)<br>6 weeks<br>FISH probing | ↑ BW (4%)<br>↑ BWG (2%) | ↓ (2%)      | =          | ND                                     | Cecum:<br>↑ Lactobacillus<br>↑ Bifidobacterium                    | ND                        | ND                                                                    | Cecum:<br>↑ Alpha proteobacteria                                     |
| Yang 2008         | MOS          | Cobb broilers chickens<br>Male<br>Healthy                 | MOS (2g/kg of diet)<br>3 weeks<br>Culture           | =                       | =           | =          | = (jejunum)                            | Ileum:<br>↑ Lactobacillus                                         | = (jejunum, Ileum, Cecum) | Ileum:<br>= [Lactic acid] and [acetate]                               | Jejunum, Ileum and Cecum:<br>= C.perfringens                         |
|                   | MOS          | Cobb broilers chickens<br>Male<br>E.coli inoculation      |                                                     | =                       | =           | ↑ FCR      | = (jejunum)                            | Jejunum, Ileum, Ceacum:<br>= Lactobacillus                        | = (jejunum, Ileum, Cecum) | Ileum:<br>= [Lactic acid] and [acetate]                               | Jejunum, Ileum and Cecum:<br>= C.perfringens                         |
|                   | FOS          | Cobb broilers chickens<br>Male<br>Healthy                 | FOS (10g/kg of diet)<br>3 weeks<br>Culture          | =                       | ↑           | =          | = (jejunum)                            | Ileum:<br>↑ Lactobacillus                                         | ↓ (ileum)                 | Ileum:<br>↑ [Lactic acid] = [acetate]                                 | Jejunum, Ileum and Cecum:<br>= C.perfringens                         |
|                   | FOS          | Cobb broilers chickens<br>Male<br>E.coli inoculation      |                                                     | ↑ BWG                   | =           | =          | = (jejunum)                            | Jejunum, Ileum, Cecum:<br>= Lactobacillus                         | = (jejunum, Ileum, Cecum) | Ileum:<br>↑ [Lactic acid] = [acetate]                                 | Cecum:<br>↓ C.perfringens                                            |
| Fernandez 2002    | MOS          | Isa-brown laying hens<br>Female<br>Healthy                | MOS (2.5% of diet)<br>4 weeks<br>Culture            | ND                      | ND          | ND         | ND                                     | Cecum:<br>= Lactobacillus<br>= Bifidobacterium<br>↑ Enterococcus  | ND                        | ND                                                                    | Cecum:<br>↓ S.enteriditis                                            |
|                   |              | Isa-brown laying hens<br>Female<br>Salmonella enteriditis |                                                     | ND                      | ND          | ND         | ND                                     | Cecum:<br>= Lactobacillus<br>= Enterococcus                       | ND                        | ND                                                                    | Cecum:<br>↓ S.enteriditis                                            |

Table S7: Effect of fibres on the phenotype and gastro-intestinal microbiota of poultry

| Ref            | Intervention                                 | Conditions                                  | Methods                                                   | Phenotype     |             |            |                                                                 | Microbiota                                                       |                                           |
|----------------|----------------------------------------------|---------------------------------------------|-----------------------------------------------------------|---------------|-------------|------------|-----------------------------------------------------------------|------------------------------------------------------------------|-------------------------------------------|
|                |                                              |                                             |                                                           | Weight        | Food intake | FCR or FCE | Villi structure                                                 | Lactic acid-producing bacteria                                   | Pathogenic and/or Zoonotic bacteria       |
| Xie 2020       | Locust bean gum                              | AA broiler chicken<br>Healthy               | Fiber (0.1% of diet)<br>6 weeks<br>FISH probing           | ND            | ND          | ND         | Duodenum, Jejunum and Ileum:<br>= VH<br>= CD<br>= VH/CD ratio   | Cecum:<br>= Lactobacillus                                        | Cecum:<br>= E.coli                        |
|                | Locust bean gum enzymolysate                 |                                             | Fiber (0.01% to 0.03% of diet)<br>6 weeks<br>FISH probing | ND            | ND          | ND         | Duodenum and Ileum:<br>↑ VH<br>= CD<br>Jejunum:<br>= VH<br>= CD | Cecum:<br>↑ Lactobacillus                                        | Cecum:<br>↓ E.coli                        |
| Venardou 2021  | Laminarin                                    | Ross 308 broiler chicken<br>Male<br>Healthy | Fiber (150 to 300 ppm)<br>5 weeks<br>Sequencing           | ↑ BW<br>↑ BWG | ↑           | =          | ND                                                              | Cecum:<br>= Lactobacillus<br>↑ Bifidobacterium                   | ND                                        |
| Pandi 2017     | Sweet potato flour                           | Cobb broiler chicken<br>Male<br>Healthy     | 5 weeks<br>Culture                                        | ↓ BW<br>↓ BWG | ↑           | ↑          | Jejunum and Ileum<br>= VH<br>= CD<br>= VH/CD ratio              | Cecum:<br>= Lactobacillus                                        | Cecaum:<br>= E.coli                       |
| Fernandez 2002 | PKM (contain xylan, arabinans, galactans...) | Ise brown laying hen<br>Female<br>Healthy   | Fiber (2.5% of diet)<br>4 weeks<br>Culture                | ND            | ND          | ND         | ND                                                              | Cecum:<br>= Lactobacillus<br>↑ Bifidobacterium<br>↓ Enterococcus | Caecum:<br>↓ Salmonella                   |
| Peinado 2013   | di-D-fructose dianhydride-enriched caramels  | Cobb broilers chickens<br>Male<br>Healthy   | Fiber (20g/kg of diet)<br>3 weeks<br>RTqPCR               | ↑ BW<br>↑ BWG | ↑           | =          | Ileum<br>= VH<br>= CD<br>= VH/CD ratio                          | Crop, ileum and Cecum:<br>= Lactobacillus<br>= Bifidobacterium   | Crop and Cecum:<br>↓ Escherichia-Shigella |

Table S8: Effect of enzymes on the phenotype and gastro-intestinal microbiota of poultry

| Ref           | Intervention                                                                                 | Conditions                                              | Methods                                              | Phenotype        |              |                  |                                                             | Microbiota                                                                                                                    |                                        |                                               |
|---------------|----------------------------------------------------------------------------------------------|---------------------------------------------------------|------------------------------------------------------|------------------|--------------|------------------|-------------------------------------------------------------|-------------------------------------------------------------------------------------------------------------------------------|----------------------------------------|-----------------------------------------------|
|               |                                                                                              |                                                         |                                                      | Weight           | Food intake  | FCR or FCE       | Villi structure                                             | Lactic acid-producing bacteria                                                                                                | pH                                     | Pathogenic and/or Zoonotic bacteria           |
| Pandi 2017    | Endo-1, 3 9 (4) $\beta$ -glucanase + Endo-1, 4 $\beta$ -xylanase                             | Cobb broiler chicken Male Healthy                       | 5 weeks Culture                                      | =                | =            | =                | Jejunum and Ileum:<br>= VH<br>= CD<br>= VH/CD ratio         | Cecum:<br>= Lactic acid bacteria                                                                                              | ND                                     | Cecum:<br>= E.coli                            |
| Rebolé 2010   | Endo-1,4- $\beta$ -glucanase + Endo-1, 3 (4) $\beta$ -glucanase + Endo-1,4 $\beta$ -xylanase | Cobb broiler chicken Male Healthy                       | Enzyme (100 mg/kg of diet)<br>5 weeks Culture        | =                | =            | =                | Jejunum:<br>= VH<br>= CD<br>= VH/CD ratio                   | Ileum and cecum:<br>= Lactobacillus<br>= Bifidobacterium                                                                      | = (cecum)                              | ND                                            |
| Shakouri 2008 | Endo-1,4 $\beta$ -glucanase + Endo-1,4 $\beta$ -xylanase                                     | Cobb broiler chicken Male Healthy Diet 1 (Barley)       | Enzyme (0.05% of diet)<br>4 weeks Culture            | =                | =            | =                | Jejunum:<br>= VH<br>$\uparrow$ CD<br>= VH/CD ratio          | Gizzard, Ileum and Cecum:<br>= Lactobacillus                                                                                  | = (gizzard, ileum and caecum)          | Gizzard, Ileum and Cecum:<br>= C. perfringens |
|               |                                                                                              | Cobb broiler chicken Male Healthy Diet 2 (Maize)        |                                                      | =                | =            | =                | Jejunum:<br>= VH<br>= CD<br>= VH/CD ratio                   | Gizzard, Ileum and Cecum:<br>= Lactobacillus                                                                                  | = (gizzard, ileum and cecum)           | Gizzard, Ileum and Cecum:<br>= C. perfringens |
|               |                                                                                              | Cobb broiler chicken Male Healthy Diet 3 (Sorghum)      |                                                      | =                | =            | =                | Jejunum:<br>= VH<br>$\downarrow$ CD<br>= VH/CD ratio        | Gizzard:<br>$\uparrow$ Lactobacillus<br>Ileum and caecum = Lactobacillus                                                      | = (gizzard, ileum and cecum)           | Gizzard, Ileum and Cecum:<br>= C. perfringens |
|               |                                                                                              | Cobb broiler chicken Male Healthy Diet 4 (Wheat)        |                                                      | $\downarrow$ BWG | $\downarrow$ | =                | Jejunum:<br>$\uparrow$ VH<br>= CD<br>$\uparrow$ VH/CD ratio | Gizzard:<br>$\uparrow$ Lactobacillus<br>Ileum and caecum = Lactobacillus                                                      | = (gizzard, ileum and cecum)           | Gizzard, Ileum and Cecum:<br>= C. perfringens |
| Ptak 2015     | Phytase                                                                                      | Ross 308 broilers chicken Female Healthy                | Enzyme (5000 FTU/kg of diet)<br>4 weeks FISH probing | $\uparrow$ BWG   | =            | $\downarrow$ FCR | ND                                                          | Ileum:<br>$\uparrow$ Lactobacillus / Enterococcus<br>$\downarrow$ Streptococcus / Lactococcus<br>$\downarrow$ Bifidobacterium | $\uparrow$ (crop) = (ileum and caecum) | Ileum:<br>= C. perfringens                    |
| Wu 2017       | Phytase                                                                                      | Ross 308 broilers chicken Female Healthy Diet 1 (Wheat) | Enzyme (1000 FTU/kg of diet)<br>4 weeks RTqPCR       | $\uparrow$ BWG   | $\uparrow$   | =                | ND                                                          | Cecum:<br>= Lactobacillus<br>= Enterococcus                                                                                   | ND                                     | ND                                            |
|               |                                                                                              | Ross 308 broilers chicken Female Healthy Diet 2 (Maize) |                                                      | $\uparrow$ BWG   | $\uparrow$   | =                | ND                                                          | Cacum:<br>= Lactobacillus<br>= Enterococcus                                                                                   | ND                                     | ND                                            |

*Table S9: Effect of enzymes combined with fibers on the phenotype and gastro-intestinal microbiota of poultry*

| Ref         | Enzyme                                                                                       | Fiber              | Conditions                        | Methods                                                               | Phenotype     |             |            |                                            | Microbiota                                         |           |                                                                              |                                     |
|-------------|----------------------------------------------------------------------------------------------|--------------------|-----------------------------------|-----------------------------------------------------------------------|---------------|-------------|------------|--------------------------------------------|----------------------------------------------------|-----------|------------------------------------------------------------------------------|-------------------------------------|
|             |                                                                                              |                    |                                   |                                                                       | Weight        | Food intake | FCR or FCE | Villi structure                            | Lactic acid-producing bacteria                     | pH        | SCFA                                                                         | Pathogenic and/or Zoonotic bacteria |
| Pandi 2017  | Endo-1, 3 9 (4) $\beta$ -glucanase + Endo-1, 4 $\beta$ -xylanase                             | Sweet potato flour | Cobb broiler chicken Male Healthy | 5 weeks Culture                                                       | ↓ BW<br>↓ BWG | ↑           | ↑ FCR      | Jejunum and Ileum: = VH = CD = VH/CD ratio | Cecum: = Lactic acid bacteria                      | ND        | ND                                                                           | Cecum: = E.coli                     |
| Rebolé 2010 | Endo-1,4- $\beta$ -glucanase + Endo-1, 3 (4) $\beta$ -glucanase + Endo-1,4 $\beta$ -xylanase | Inulin             | Cobb broiler chicken Male Healthy | Enzyme (100 mg/kg of diet) Prebiotic (20g/kg of diet) 5 weeks Culture | =             | =           | =          | Jejunum: = VH = CD = VH/CD ratio           | Ileum and Cecum: = Lactobacillus = Bifidobacterium | = (cecum) | Cecum: = [Total SCFA], [Lactic acid], [Propionate], [Acetate] and [Butyrate] | ND                                  |

*Table S10: Effect of lipids on the phenotype and gastro-intestinal microbiota of poultry*

| Ref       | Intervention         | Conditions                                                   | Methods                                           | Phenotype     |             |            |                                             | Immunity                                                             | Microbiota                                                  |                                                                        |                                        |                                                                 |                                                 |                                                                                   |
|-----------|----------------------|--------------------------------------------------------------|---------------------------------------------------|---------------|-------------|------------|---------------------------------------------|----------------------------------------------------------------------|-------------------------------------------------------------|------------------------------------------------------------------------|----------------------------------------|-----------------------------------------------------------------|-------------------------------------------------|-----------------------------------------------------------------------------------|
|           |                      |                                                              |                                                   | Weight        | Food intake | FCR or FCE | Villi structure                             |                                                                      | Diversity                                                   | Phylum                                                                 | Lactic acid-producing bacteria         | SCFA-producing bacteria                                         | SCFA                                            | Pathogenic and/or Zoonotic bacteria                                               |
| Wu 2021   | Lauric acid          | Ross 308 broiler chicken Male Healthy                        | LA (500 or 1000 mg/kg of diet) 6 weeks Sequencing | ↑ BW<br>↑ BWG | ↑ FI        | =          | Duodenum and Ileum: ↑ VH ↓ CD ↑ VH/CD ratio | Serum: ↑ [IgA],[IgM] and [IgY] ↓ [TNF $\alpha$ ], [IL-4] and [IL-10] | Cecum: = $\alpha$ -diversity                                | Cecum = phylum abundance                                               | ND                                     | Cecum: ↓ Phascolarctobacterium ↑ Faecalibacterium               | Cecum: ↓ [Acetate], [Butyrate] and [Propionate] | ND                                                                                |
| Yang 2019 | Lauric acid          | Cobb broiler chicken Male and Female C.perfringens + Eimeria | LA (400 mg/ kg of diet) 3 weeks Sequencing        | ND            | ND          | ND         | ND                                          | ND                                                                   | Jejunum: ↓ $\alpha$ -diversity Cecum: = $\alpha$ -diversity | Jejunum: ↓ Proteobacteria ↓ Cyanobacteria ↓ Bacteroidetes ↑ Firmicutes | Cecum and Jejunum: = Lactobacillus     | ND                                                              | ND                                              | Cecum and Jejunum: = Escherichia shigella Jejunum: ↑ Clostridium sensus stricto 1 |
| Feng 2021 | Glycerol monolaurate | Qingyuan Patridge broilers Female Healthy                    | GM (300 mg/ kg of diet) 8 weeks Sequencing        | ND            | ND          | ND         | ND                                          | ND                                                                   | Cecum: = $\alpha$ -diversity                                | Cecum: ↓ Proteobacteria                                                | Cecum: = Lactobacillus = Streptococcus | Cecum: = Phascolarctobacterium = Faecalibacterium = Bacteroides | ND                                              | ND                                                                                |

*Table S11: Effect of amino acids on the phenotype and gastro-intestinal microbiota of poultry*

| Ref       | Intervention | Conditions                      | Methods                                          | Phenotype     |                |            |                 | Immunity                                                                                                                                                                                                                                                 | Microbiota                           |                                       |                                                              |
|-----------|--------------|---------------------------------|--------------------------------------------------|---------------|----------------|------------|-----------------|----------------------------------------------------------------------------------------------------------------------------------------------------------------------------------------------------------------------------------------------------------|--------------------------------------|---------------------------------------|--------------------------------------------------------------|
|           |              |                                 |                                                  | Weight        | Food intake    | FCR or FCE | Villi structure |                                                                                                                                                                                                                                                          | Phylum                               | Lactic acid-producing bacteria        | Pathogenic and/or Zoonotic bacteria                          |
| Ruan 2020 | L-arginine   | Quingyan chicken Female Healthy | AA (9.7 to 13.3 g/kg of diet) 4 weeks Sequencing | ↑ BW<br>↑ BWG | ↑ FI<br>↑ ADFI | ↓ FCR      | ND              | Blood: ↑ % lymphocyte CD3+, CD4+ and CD4+/CD8+ ratio<br>Jejunum and ileum: ↑ [GSH-Px],[T-AOC], [HMOX1] and [NRF2]<br>↓ [MDA] jejunum (diminution du Stressox)<br>Ileum: ↑ [GPx1] and [sIgA]<br>↓ [IL-1 $\beta$ ], [MYD88] and [TLR4]<br>Jejunum: ↑ [IgG] | Ileum: ↑ Firmicutes ↓ Proteobacteria | Ileum: = Lactobacillus = Enterococcus | Ileum: = Escherichia-shigella ↓ Clostridium sensus stricto 1 |

Table S12: Effect of antibiotics on the phenotype and gastro-intestinal microbiota of poultry (1/2)

| Ref             | Intervention               | Conditions                                                 | Methods                                                                                                                          | Phenotype     |             |            |                                                                                    | Immunity                                                                                                 | Intestinal barrier                          | Microbiota                                   |                                            |                                                          |                                                                           |                     |                                                                          |                                                        |
|-----------------|----------------------------|------------------------------------------------------------|----------------------------------------------------------------------------------------------------------------------------------|---------------|-------------|------------|------------------------------------------------------------------------------------|----------------------------------------------------------------------------------------------------------|---------------------------------------------|----------------------------------------------|--------------------------------------------|----------------------------------------------------------|---------------------------------------------------------------------------|---------------------|--------------------------------------------------------------------------|--------------------------------------------------------|
|                 |                            |                                                            |                                                                                                                                  | Weight        | Food intake | FCR or FCE | Villi structure                                                                    |                                                                                                          |                                             | Diversity                                    | Phylum                                     | Lactic acid-producing bacteria                           | SCFA-producing bacteria                                                   | pH                  | SCFA                                                                     | Pathogenic and/or Zoonotic bacteria                    |
| Nava 2009       | Bacitracin                 | Cobb broiler chicken<br>Male<br>Healthy                    | Antibiotic (25ppm of diet)<br>4 weeks<br>RTqPCR                                                                                  | =             | =           | =          | ND                                                                                 | ND                                                                                                       | ND                                          | ND                                           | ND                                         | Ileum:<br>= Lactobacillus                                | ND                                                                        | ND                  | ND                                                                       | ND                                                     |
| Vineetha 2016   | Bacitracin                 | Aribro Dhanraja broiler chicken<br>Healthy                 | Antibiotic (20g/100g of diet)<br>5 weeks<br>Culture                                                                              | =             | =           | =          | Duodenum:<br>↓ VH<br>↓ CD<br>= VH/CD ratio                                         | ND                                                                                                       | ND                                          | ND                                           | ND                                         | Crop and Ileum:<br>↑ Lactobacillus                       | ND                                                                        | ND                  | ND                                                                       | Crop, Ileum and Cecum:<br>↓ E.coli<br>↓ Salmonella     |
| Yang 2008       | Bacitracin                 | Cobb broiler chicken<br>Male<br>Healthy                    | Antibiotic (50 ppm)<br>E.coli (10 <sup>7</sup> CFU/mL;<br>1mL/animal then 10 <sup>5</sup> CFU/mL of water)<br>3 weeks<br>Culture | =             | =           | =          | = (Jejunum)                                                                        | ND                                                                                                       | ND                                          | ND                                           | ND                                         | Ileum:<br>↑ Lactobacillus                                | ND                                                                        | =                   | = (Ileum)                                                                | Ileum:<br>↓ C. perfringens                             |
|                 |                            | Cobb broiler chicken<br>Male<br>E.coli                     |                                                                                                                                  | =             | =           | ↑ FCE      | = (Jejunum)                                                                        | ND                                                                                                       | ND                                          | ND                                           | ND                                         | Ileum:<br>= Lactobacillus                                | ND                                                                        | =                   | = (Ileum)                                                                | Ileum:<br>↓ C. perfringens                             |
| Daneshmand 2019 | Bacitracin                 | Cobb broiler chicken<br>Male<br>E.coli                     | Antibiotic (40 mg/kg of diet)<br>E.coli (10 <sup>8</sup> CFU)<br>3 weeks<br>Culture                                              | ↑ ADG         | ↑ ADFI      | ↓ FCR      | Jejunum:<br>↑ VH<br>↑ VSA<br>= CD<br>= VH/CD ratio                                 | Jejunum:<br>= [IL-6]<br>= [IL-2]                                                                         | Jejunum:<br>= MUC2, Claudin2, Occludin mRNA | ND                                           | ND                                         | Ileum:<br>= Lactobacillus<br>= Bifidobacterium           | ND                                                                        | ND                  | ND                                                                       | Ileum:<br>↓ E.coli                                     |
| Pereira 2018    | Bacitracin + Neomycin      | Cobb broiler chicken<br>Male<br>Healthy                    | Antibiotic (40 mg/kg of diet)<br>6 weeks<br>Sequencing                                                                           | =             | =           | =          | ND                                                                                 | ND                                                                                                       | ND                                          | ↓ α-diversity and richness                   | Cecum:<br>↑ Firmicutes<br>↓ Bacteroidetes  | Small intestine:<br>↑ Lactobacillus<br>= Bifidobacterium | Small intestine:<br>↓ Bacteroides<br>= Ruminococcus<br>= Faecalibacterium | ND                  | ND                                                                       | ND                                                     |
| Adeyemi 2021    | Oxytetracycline + Neomycin | Ross 308 broiler chicken<br>Male and Female<br>Healthy     | Antibiotic (0.4g/ kg of diet)<br>6 weeks<br>Culture                                                                              | ↑ BW<br>↑ BWG | ↑ FI        | ↓ FCR      | ND                                                                                 | Splenic:<br>↑ [IL-10]<br>↓ [TNFα]<br>↓ [IgG]<br>Muscle:<br>↑ [SOD]<br>↑ [GPx]<br>↑ [Catalase]<br>↑ [TAS] | ND                                          | ND                                           | Cecum:<br>↑ proteobacteria                 | Ileum and Cecum:<br>= Lactobacillus                      | ND                                                                        | ND                  | ND                                                                       | Ileum and Cecum:<br>↓ E.coli<br>↓ Salmonella           |
| Wu 2021         | Aureomycin                 | Ross 308 broiler chicken<br>Male<br>Healthy                | Antibiotic (75mg/ kg of diet)<br>6 weeks<br>Sequencing                                                                           | ↑ BW<br>↑ ADG | =           | =          | Duodenum and Ileum:<br>↑ VH<br>↓ CD<br>↑ VH/CD ratio                               | Serum:<br>↑ [IL-1β]<br>↑ [IL-6]                                                                          | ND                                          | = α-diversity<br>Modification of β-diversity | Cecum:<br>↑ proteobacteria                 | ND                                                       | Cecum<br>↓ Phascolarctobacterium                                          | ND                  | ND                                                                       | Cecum:<br>↑ Escherichia-shigella                       |
| Xing 2016       | Aureomycin                 | Linwu duckling<br>Female<br>Healthy                        | Antibiotic (150mg/ kg of diet)<br>9 weeks<br>RTqPCR                                                                              | ND            | ND          | ND         | Jejunum:<br>= VH and CD<br>↑ VH/CD ratio<br>Ileum:<br>= CD and VH/CD ratio<br>↑ VH | Jejunum:<br>↓ IL-2, IL-10, IL-18 mRNA<br>Ileum:<br>↓ IL-2, IL-8, IL-10 mRNA                              | ND                                          | ND                                           | ND                                         | Cecum:<br>= Lactobacillus<br>= Bifidobacterium           | Cecum<br>= Magasphaera elsdenii<br>= Clostridium leptum                   | ND                  | ND                                                                       | Cecum:<br>= E.coli                                     |
| Ruan 2021       | Virginiamycin              | Quingyan chicken<br>Female<br>Healthy                      | Antibiotic (20mg/ kg of diet)<br>4 weeks<br>Sequencing                                                                           | =             | =           | =          | ND                                                                                 | Jejunum:<br>↑ total antioxidant capacity                                                                 | Ileum:<br>↑ Claudine 1, MUC 2 and AvBD1     | = α-diversity                                | Ileum:<br>↑ Actinobacteria<br>↓ Firmicutes | Cecum:<br>= Lactobacillus<br>= Enterococcus              | ND                                                                        | ND                  | ND                                                                       | ND                                                     |
| Han 2013        | Virginiamycin              | Arbor Acres broiler chickens<br>Male and Female<br>Healthy | Antibiotic (10mg/ kg of diet)<br>3 or 6 weeks<br>RTqPCR                                                                          | ↑ BW<br>↑ ADG | =           | ↓ FCR      | ND                                                                                 | Plasma<br>↓ [MDA]<br>= [TAS] and [SOD]                                                                   | ND                                          | = α-diversity, evenness and richness         | ND                                         | ND                                                       | ND                                                                        | ND                  | ND                                                                       | ND                                                     |
| Johansen 2007   | Salinomycin                | Ross 308 broiler chicken<br>Female<br>Campylobacter jejuni | Antibiotic (75mg/ kg of diet)<br>Campylobacter (10 <sup>7</sup> CFU)<br>3 or 6 weeks<br>Culture                                  | ↑ BW          | ND          | ND         | ND                                                                                 | Jejunum:<br>↑ total antioxidant capacity                                                                 | ND                                          | ND                                           | ND                                         | Ileum and Cecum:<br>= Lactobacillus                      | ND                                                                        | ND                  | ND                                                                       | Ileum and Cecum:<br>= Campylobacter<br>↓ C.perfringens |
| Czerwinski 2012 | Salinomycin                | Ross 308 broiler chicken<br>Female<br>Healthy              | Antibiotic (0.5g/ kg of diet)<br>4 weeks<br>FISH probing                                                                         | ↓ BWG         | ↓ FI        | ↑ FCE      | Jejunum:<br>↓ VH<br>= CD<br>= VH/CD ratio                                          | ND                                                                                                       | ND                                          | ND                                           | ND                                         | Ileum and Cecum:<br>↓ Lactobacillus                      | ND                                                                        | ↑ (Ileum and Cecum) | Ileum:<br>↑ % acetate<br>↓ [Lactic acid], [SCFA total] and % lactic acid | ND                                                     |
| Xia 2019        | Flavomycin                 | Tegek broiler chicken<br>Male<br>Healthy                   | Antibiotic (400 ppm)<br>6 weeks<br>FISH probing                                                                                  | ↑ BW<br>↑ BWG | ↓ FI        | =          | ND                                                                                 | Serum:<br>↑ [IgM]                                                                                        | ND                                          | ND                                           | ND                                         | Cecum:<br>↑ Lactobacillus<br>↓ Bifidobacterium           | Cecum:<br>= Bacteroides spp                                               | ND                  | ND                                                                       | ND                                                     |
| Xie 2020        | Flavomycin                 | AA broiler chicken<br>Healthy                              | Antibiotic (62.5 mg/kg of diet)<br>6 weeks<br>FISH probing                                                                       | ND            | ND          | ND         | = VH, CD and VH/CD in duodenum, jejunum and ileum                                  | ND                                                                                                       | ND                                          | ND                                           | ND                                         | Cecum:<br>= Lactobacillus                                | ND                                                                        | ND                  | ND                                                                       | Caecum:<br>= E.coli                                    |
| Yang 2012       | Colistine                  | Lignan yellow broiler chicken<br>Male<br>Healthy           | Antibiotic (10 mg/kg of diet)<br>6 weeks<br>Culture                                                                              | ↑ BW<br>↑ ADG | ND          | ND         | ND                                                                                 | Serum:<br>↑ [IgA], [IgG], [IgM]                                                                          | ND                                          | ND                                           | ND                                         | Cecum:<br>↓ Lactobacillus<br>↓ Bifidobacterium           | ND                                                                        | ND                  | ND                                                                       | Cecum:<br>↑ E.coli<br>↑ Salmonella<br>↑ C.perfringens  |
| Cao 2018        | Colistine                  | Ross 308 broiler chicken<br>Healthy                        | Antibiotic (20 mg/kg of diet)<br>6 weeks<br>sequencing                                                                           | ↑ BW<br>↑ ADG | ND          | =          | ND                                                                                 | ND                                                                                                       | ND                                          | ND                                           | ND                                         | Cecum:<br>= Lactobacillus                                | Cecum:<br>↓ Ruminococcus                                                  | ND                  | ND                                                                       | ND                                                     |

Table S12: Effect of antibiotics on the phenotype and gastro-intestinal microbiota of poultry (2/2)

| Ref              | Intervention                  | Conditions                              | Methods                                                                   | Phenotype |             |            |                                         | Immunity                     | Intestinal barrier   | Diversity                                    | Phylum                                    | Microbiota                                                                                                      |                                                                          |    |                      |                                                            |
|------------------|-------------------------------|-----------------------------------------|---------------------------------------------------------------------------|-----------|-------------|------------|-----------------------------------------|------------------------------|----------------------|----------------------------------------------|-------------------------------------------|-----------------------------------------------------------------------------------------------------------------|--------------------------------------------------------------------------|----|----------------------|------------------------------------------------------------|
|                  |                               |                                         |                                                                           | Weight    | Food intake | FCR or FCE | Villi structure                         |                              |                      |                                              |                                           | Lactic acid-producing bacteria                                                                                  | SCFA-producing bacteria                                                  | pH | SCFA                 | Pathogenic and/or Zoonotic bacteria                        |
| Feng 2020        | Oxytetracycline + Nosiheptide | Yellow feather briuikers<br>Healthy     | Oxy (200 mg/kg of diet)<br>Nosi (250 mg/kg of diet)<br>9 weeks sequencing | =         | =           | =          | ND                                      | ND                           | ND                   | = $\alpha$ -diversity, evenness and richness | = (Cecum)                                 | Cecum:<br>= Lactobacillus<br>= Enterococcus                                                                     | Cecum:<br>= Bacteroides<br>= Phascolarctobacterium<br>= Faecalibacterium | ND | ND                   | ND                                                         |
| Singh 2013       | Penicillin                    | Cobb broiler chicken<br>Male<br>Healthy | Antibiotic (55 mg/kg of diet)<br>3 weeks RTqPCR                           | ND        | ND          | ND         | ND                                      | ND                           | ND                   | ↓ $\alpha$ -diversity                        | Cecum:<br>↑ Firmicutes<br>↓ Bacteroidetes | ND                                                                                                              | Caecum<br>↑ Roseburia                                                    | ND | ND                   | Cecum:<br>↓ Escherichia<br>↓ Salmonella<br>↓ Campylobacter |
| Mountzouris 2019 | Avilamycin                    | Cobb broiler chicken<br>Male<br>Healthy | Antibiotic (2.5 mg/kg of diet)<br>6 weeks RTqPCR                          | ND        | ND          | ND         | ND                                      | Ileum and Caecum:<br>↑ [IgA] | = (Ileum and caecum) | ND                                           | ND                                        | Cecum:<br>↓ Lactobacillus<br>= Bifidobacterium                                                                  | Ileum and Cecum:<br>= Bacteroides, clostridium<br>leptum and coccoides   | ND | = (Ileum and Caecum) | Ileum and Cecum:<br>= E. coli<br>= C. perfringens          |
| Viveros 2011     | Avoparcin                     | Cobb broiler chicken<br>Male<br>Healthy | Antibiotic (50 mg/kg of diet)<br>3 weeks Culture                          | ND        | ND          | ↓ FCR      | Jejunum<br>↓ VH and CD<br>↑ VH/CD ratio | ND                           | ND                   | ND                                           | ND                                        | Ileum:<br>↓ Lactobacillus<br>↑ Enterococcus<br>Cecum:<br>↑ Lactobacillus<br>↑ Enterococcus<br>= Bifidobacterium | ND                                                                       | ND | ND                   | Cecum:<br>↑ E. coli                                        |

Table S13: Effect of antimicrobial peptides on the phenotype and gastro-intestinal microbiota of poultry

| Ref             | Intervention | Conditions                                     | Methods                                                                                      | Phenotype |             |            |                                                            | Immunity                     | Intestinal barrier                              | Microbiota                                     |                         |                                     |
|-----------------|--------------|------------------------------------------------|----------------------------------------------------------------------------------------------|-----------|-------------|------------|------------------------------------------------------------|------------------------------|-------------------------------------------------|------------------------------------------------|-------------------------|-------------------------------------|
|                 |              |                                                |                                                                                              | Weight    | Food intake | FCR or FCE | VH, CD, VH/CD ratio                                        |                              |                                                 | Lactic acid-producing bacteria                 | SCFA-producing bacteria | Pathogenic and/or Zoonotic bacteria |
| Daneshmand 2019 | cLF36        | Cobb broiler chicken<br>Male<br><i>E. coli</i> | Peptide (10 mg/kg of diet)<br><i>E. coli</i> (10 <sup>8</sup> CFU/animal)<br>3 weeks Culture | ↑ ADG     | =           | ↓ FCR      | Jejunum:<br>↑ VH<br>↑ VW<br>↑ VSA<br>= CD<br>= VH/CD ratio | Jejunum:<br>↓ IL-2<br>↑ IL-6 | Jejunum:<br>↑ Claudin-1<br>↑ Occludin<br>↓ MUC2 | Ileum:<br>↑ Lactobacillus<br>= Bifidobacterium | ND                      | Ileum:<br>↓ <i>E. coli</i>          |

Table S14: Effect of plants and seaweed on the phenotype and gastro-intestinal microbiota of poultry (1/2)

| Ref               | Intervention               | Conditions                                            | Methods                                                                                                            | Phenotype     |                |            |                                         | Immunity                                                                                                                                                                          | Microbiota                                                                                  |                         |                                              |
|-------------------|----------------------------|-------------------------------------------------------|--------------------------------------------------------------------------------------------------------------------|---------------|----------------|------------|-----------------------------------------|-----------------------------------------------------------------------------------------------------------------------------------------------------------------------------------|---------------------------------------------------------------------------------------------|-------------------------|----------------------------------------------|
|                   |                            |                                                       |                                                                                                                    | Weight        | Food intake    | FCR or FCE | Villi structure                         |                                                                                                                                                                                   | Lactic acid-producing bacteria                                                              | SCFA-producing bacteria | Pathogenic and/or Zoonotic bacteria          |
| Kang 2017         | Chorella by products       | Ross 308 broiler chicken Males Healthy                | Plants (25, 50 or 75g/kg of diet) 5 weeks Culture                                                                  | ↑ BW<br>↑ BWG | =              | =          | Ileum:<br>↑ VH<br>↑ CD<br>↓ VH/CD ratio | Plasma<br>↑ IgG, IgM and IgA                                                                                                                                                      | Cecum:<br>↑ Lactobacillus                                                                   | ND                      | Cecum:<br>↓ Salmonella<br>↓ E.coli           |
| Ruan 2021         | Oregano essential oil      | Quingyan chicken Female Healthy                       | Plants (105 or 300 mg/kg of diet) 4 weeks Sequencing                                                               | ↑ BW<br>↑ BWG | ↑ FI<br>↑ ADFI | =          | ND                                      | Plasma, jejunum, ileum:<br>↑ [GSH-Px]<br>Jejunum:<br>↑ [T-AOC]<br>↓ [MDA]<br>Plasma:<br>↑ [IgG]<br>↓ [TGFβ]<br>Ileum:<br>↑ [SIgA]<br>↓ [TNFα]<br>↑ [GPx1]<br>↑ [SOD1]<br>↑ [NRF2] | Ileum:<br>↑ Lactobacillus                                                                   | ND                      | Ileum:<br>↑ Clostridium sensu stricto_1      |
| Kim 2015          | Capsicum / Curcuma longa   | Ross 308 broiler chickens Male C.perfringens/E.maxima | Plants (4 mg/kg of diet) C.perfringens (10 <sup>9</sup> CFU) E.maxima (10 <sup>4</sup> oocysts) 3 weeks Sequencing | =             | ND             | ND         | ND                                      | ND                                                                                                                                                                                | Ileum:<br>↓ Lactobacillus                                                                   | ND                      | ND                                           |
|                   |                            | Cobb 500 broiler chickens Male C.perfringens/E.maxima |                                                                                                                    | ↑ BW          | ND             | ND         | ND                                      | ND                                                                                                                                                                                | Ileum:<br>↑ Lactobacillus                                                                   | ND                      | ND                                           |
|                   |                            | Hubbard broiler chickens Male C.perfringens/E.maxima  |                                                                                                                    | ↑ BW          | ND             | ND         | ND                                      | ND                                                                                                                                                                                | Ileum:<br>↑ Lactobacillus                                                                   | ND                      | ND                                           |
| Taha 2019         | Coriander seed powder      | Arbor acres broiler chicken Healthy                   | Plants (0.1 to 0.4% of diet) 6 weeks Culture                                                                       | ↑ BW<br>↑ BWG | ↑ FI           | ↓ FCR      | ND                                      | ND                                                                                                                                                                                | ND                                                                                          | ND                      | Ileum:<br>↓ C.perfringens<br>↓ E.coli        |
| Viveros 2011      | Grape (pomace concentrate) | Cobb broiler chicken Male Healthy                     | Plants (60g/kg of diet) 3 weeks Culture                                                                            | =             | =              | ↓ FCR      | Jejunum:<br>= VH<br>↓ CD<br>↑ VH/CD     | ND                                                                                                                                                                                | Ileum:<br>↓ Lactobacillus<br>= Enterococcus<br>Caecum:<br>↑ Lactobacillus<br>↑ Enterococcus | ND                      | Ileum:<br>= E.coli<br>Caecum:<br>↑ E.coli    |
|                   | Grape (Seed extract)       | Cobb broiler chicken Male Healthy                     | Plants (7.2g/kg of diet) 3 weeks Culture                                                                           | ↓ BWG         | =              | =          | Jejunum:<br>↓ VH<br>↓ CD<br>= VH/CD     | ND                                                                                                                                                                                | Ileum:<br>= Lactobacillus<br>↑ Enterococcus<br>Caecum:<br>↑ Lactobacillus<br>↑ Enterococcus | ND                      | Ileum:<br>= E.coli<br>Caecum:<br>↑ E.coli    |
| Reda 2020         | Red Pepper Oil             | Japanese quails Healthy                               | Plants (0.4 to 1.6g/kg of diet) 5 weeks Culture                                                                    | ↑ BW<br>↑ BWG | ↑              | ↑ FCR      | ND                                      | Plasma:<br>↓ [MDA]<br>↓ [IgA]<br>↑ [CAT]<br>↑ [GSH]                                                                                                                               | Cecum:<br>↓ Lactobacillus                                                                   | ND                      | Cecum:<br>↓ E.coli<br>↓ Salmonella           |
| Vase-Khavari 2018 | Rhus coriaria              | Ross 308 broiler chicken Healthy                      | Plants (0.5 % of diet) 6 weeks Culture                                                                             | =             | =              | =          | ND                                      | ND                                                                                                                                                                                | Cecum:<br>↑ Lactobacillus                                                                   | ND                      | Cecum:<br>= E.coli                           |
|                   | Heracleum persicum         | Ross 308 broiler chicken Healthy                      |                                                                                                                    | =             | =              | =          | ND                                      | ND                                                                                                                                                                                | Cecum:<br>= Lactobacillus                                                                   | ND                      | Cecum:<br>= E.coli                           |
|                   | Mentha piperita            | Ross 308 broiler chicken Healthy                      |                                                                                                                    | =             | =              | =          | ND                                      | ND                                                                                                                                                                                | Cecum:<br>↑ Lactobacillus                                                                   | ND                      | Cecum:<br>= E.coli                           |
| Adeyemi 2021      | Crescentia cujete leaf     | Ross 308 broiler chicken Male and Female Healthy      | Plants (2.5 or 5% of diet) 6 weeks Culture                                                                         | ↑ BW<br>↑ BWG | ↑ FI           | ↓ FCR      | ND                                      | ND                                                                                                                                                                                | Ileum:<br>↑ Lactobacillus<br>Cecum:<br>= Lactobacillus                                      | ND                      | Ileum and Cecum:<br>↓ E.coli<br>↓ Salmonella |
|                   | Launaea taraxacifolia leaf | Ross 308 broiler chicken Male and Female Healthy      |                                                                                                                    | ↑ BW<br>↑ BWG | ↑ FI           | ↓ FCR      | ND                                      | ND                                                                                                                                                                                | Ileum:<br>↑ Lactobacillus<br>Cecum:<br>= Lactobacillus                                      | ND                      | Ileum and Cecum:<br>↓ E.coli<br>↓ Salmonella |

*Table S14: Effect of plants and seaweed on the phenotype and gastro-intestinal microbiota of poultry (2/2)*

| Ref               | Intervention                           | Conditions                                       | Methods                                           | Phenotype    |             |            |                                                                                | Immunity                                                                                                     | Lactic acid-producing bacteria                                     | Microbiota                                                          |                                     |
|-------------------|----------------------------------------|--------------------------------------------------|---------------------------------------------------|--------------|-------------|------------|--------------------------------------------------------------------------------|--------------------------------------------------------------------------------------------------------------|--------------------------------------------------------------------|---------------------------------------------------------------------|-------------------------------------|
|                   |                                        |                                                  |                                                   | Weight       | Food intake | FCR or FCE | Villi structure                                                                |                                                                                                              |                                                                    | SCFA-producing bacteria                                             | Pathogenic and/or Zoonotic bacteria |
| Divani 2018       | Plantago ovata                         | Ross 308 broiler chicken Male Healthy            | Plants (5 to 20 g/kg of diet) 6 weeks Culture     | ↑ BWG        | =           | ↓ FCR      | Duodenum: ↑ VH ↑ CD<br>Jejunum: ↑ VH = CD<br>Ileum: = VH = CD                  | ND                                                                                                           | Ileum: ↑ Lactobacillus                                             | ND                                                                  | Ileum: ↓ E.coli                     |
| Kulshreshtha 2014 | Chondrus Crispus                       | Lohmann Brown classic laying hens Female Healthy | Plants (0.5 to 2% of diet) 4 weeks RTqPCR         | ↑ egg weight | =           | ↓ FCR      | Ileum: ↑ VH ↑ CD                                                               | ND                                                                                                           | Ileum: ↓ Lactobacillus acidophilus<br>↑ Bifidobacterium longum     | ND                                                                  | Ileum: ↓ C.perfringens              |
|                   | Sarcodiotheca gaudichaudii             |                                                  |                                                   | =            | =           | ↓ FCR      | Ileum: ↑ VH = CD                                                               | ND                                                                                                           | Ileum: ↑ Lactobacillus acidophilus<br>↑ Bifidobacterium longum     | ND                                                                  | Ileum: ↓ C.perfringens              |
| Fagundes 2016     | 50% Corn + 50% Shorghum                | Ross AP95 broiler chicken Male Healthy           | 10 days Sequencing                                | =            | =           | =          | Jejunum: = VH = CD = VH/CD                                                     | ND                                                                                                           | Small intestine and caecum: = lactic acid bacteria                 | Small intestine: = Blautia = Faecalibacterium                       | ND                                  |
|                   | 100% Shorghum                          |                                                  |                                                   | =            | =           | =          | Jejunum: = VH = CD = VH/CD                                                     | ND                                                                                                           | Small intestine: = lactic acid bacteria<br>Caecum: ↑ Lactobacillus | Small intestine: = Blautia = Faecalibacterium                       | ND                                  |
| Scocco 2016       | Oregano aqueous extract                | Ross 308 broiler chicken Female Healthy          | plants (2g/ kg of diet) 3 or 6 weeks Culture      | =            | ND          | =          | ND                                                                             | ND                                                                                                           | ND                                                                 | ND                                                                  | Cecum: ↓ E.coli                     |
| Abolfathi 2019    | Elecampane rhizome - methanol extracts | Ross 308 broiler chicken Male Healthy            | plants (500 or 100 mg/kg of diet) 6 weeks Culture | ↑ BWG        | =           | ↓ FCR      | Duodenum and jejunum: = VH =CD = VH/CD ratio<br>Ileum: = VH ↓ CD ↑ VH/CD ratio | Duodenum, jejunum and Ileum: ↑ SOD activity ↑ CAT activity ↑ GPx activity ↓ MDA                              | Ileum: ↑ Lactobacillus = Bifidobacterium                           | ND                                                                  | Ileum: = E.coli = Salmonella        |
|                   | Elecampane rhizome - n-hexane extracts |                                                  |                                                   | ↑ BWG        | =           | ↓ FCR      | Duodenum and jejunum: = VH =CD = VH/CD ratio<br>Ileum: = VH ↓ CD = VH/CD ratio | Duodenum: ↑ SOD activity ↑ CAT activity ↑ GPx activity ↓ MDA<br>Jejunum: ↑ CAT activity ↑ GPx activity ↓ MDA | Ileum: ↑ Lactobacillus = Bifidobacterium                           | ND                                                                  | Ileum: = E.coli = Salmonella        |
| Feng 2020         | Phytosterol                            | Yellow-featherer briuker Healthy                 | plants (25 mg/kg of diet) 9 weeks Sequencing      | =            | =           | =          | ND                                                                             | ND                                                                                                           | Cecum: =Lactobacillus                                              | Cecum: = Phascolarctobacterium = Faecalibacterium = Lachnospiraceae | ND                                  |

*Table S15: Effect of minerals on the phenotype and gastro-intestinal microbiota of poultry (1/2)*

| Ref          | Intervention                   | Conditions                                            | Methods                                                                            | Phenotype |             |            |                                   |                                                                       | Diversity                                                                       | Phylum | Microbiota                                                                           |                                                                                   |                                                                                                                                     |                                     |
|--------------|--------------------------------|-------------------------------------------------------|------------------------------------------------------------------------------------|-----------|-------------|------------|-----------------------------------|-----------------------------------------------------------------------|---------------------------------------------------------------------------------|--------|--------------------------------------------------------------------------------------|-----------------------------------------------------------------------------------|-------------------------------------------------------------------------------------------------------------------------------------|-------------------------------------|
|              |                                |                                                       |                                                                                    | Weight    | Food intake | FCR or FCE | Villi structure                   |                                                                       |                                                                                 |        | Lactic acid-producing bacteria                                                       | SCFA-producing bacteria                                                           | SCFA                                                                                                                                | Pathogenic and/or Zoonotic bacteria |
| Reed 2018    | Zinc biofortified wheat        | Cornish Cross broiler chicken Male and Female Healthy | Zn (46.5 µg/g of diet) 6 weeks Sequencing                                          | ND        | ND          | ND         | Duodenum: = villus surface area   | Cecum: = $\alpha$ diversity<br>Modification of the $\beta$ -diversity | Cecum: = Firmicutes<br>= Actinobacteria<br>= Proteobacteria                     |        | Cecum: ↑ Lactobacillus reuteri                                                       | Cecum: ↑ Dorea<br>↑ Lachnospiraceae                                               | ND                                                                                                                                  | ND                                  |
| Shao 2014    | Zinc                           | Cobb 500 broiler chicken Male Salmonella Typhimurium  | Zn (120 mg/kg of diet) Salmonella (109 CFU/mL ; 0.8 mL/animal) 2 or 6 weeks RTqPCR | ↑ BW      | ↑ FI        | =          | Ileum: ↑ VH = CD<br>↑ VH/CD ratio | Ileum: = $\alpha$ diversity<br>= richness                             | ND                                                                              |        | Ileum: ↑ Lactobacillus = Enterococcus                                                | ND                                                                                | ND                                                                                                                                  | Ileum: = Salmonella Typhimurium     |
| Wang 2014    | Zinc                           | White king pigeons Male and Female Healthy            | Zn (2 or 10 mg/mL ; 1 mL/animal) 4 weeks Culture                                   | ↑ BWG     | =           | =          | ND                                | ND                                                                    | ND                                                                              |        | Cecum: ↑ Lactobacillus<br>↓ Bifidobacterium<br>↑ Enterococcus                        | ND                                                                                | ND                                                                                                                                  | Cecum: ↓ E.coli                     |
| Reed 2015    | Zinc                           | Cornish Cross broiler chicken Healthy                 | Zn (42 µg/g of diet) 4 weeks Sequencing                                            | ND        | ND          | ND         | ND                                | Cecum: = $\alpha$ diversity<br>↑ chao-1 index and species number      | Cecum: ↓ Proteobacteria<br>↓ Bacteroidetes<br>↑ Firmicutes/Proteobacteria ratio |        | Cecum: ↓ Enterococcus                                                                | ND                                                                                | Cecum: ↑ [Acetate] = [Propionate] = [Butyrate]                                                                                      | ND                                  |
| Pineda 2012  | Zinc                           | Ross 308 broiler chicken Healthy                      | Zn (2 or 10 mg/kg of water) 7 weeks Culture                                        | =         | =           | =          | ND                                | ND                                                                    | ND                                                                              |        | Cecum and Ileum: = Lactic acid bacteria                                              | ND                                                                                | Ileum and Cecum: = [Lactic acid] = [Butyrate], [Propionate] and [Acetate]                                                           | Cecum and Ileum: = C. perfringens   |
| Ptak 2015    | Calcium + Phosphore            | Ross 308 broiler chicken Female Healthy               | Calcium= 0.70% Phosphorus= 0.56% 4 weeks FISH probing                              | =         | =           | =          | ND                                | ND                                                                    | ND                                                                              |        | Ileum: ↓ Lactobacillus / enterococcus = Streptococcus/ Lactococcus = Bifidobacterium | Ileum: ↓ Clostridium coccoides - Eubacterium rectal = Clostridium leptum          | Crop and Ileum: ↑ [Total SCFA] ↑ [Acetate] Crop: = [Lactic acid] Ileum: ↑ [Lactic acid] Caecum: = [SCFA] = [Acetate] ↓ [Propionate] | Ileum: = C. perfringens             |
| Reed 2017    | Iron biofortified carioca bean | Cornish Cross broiler chicken Male and Female Healthy | Fe (48.7 µg/g of diet) 7 weeks Sequencing                                          | ND        | ND          | ND         | ND                                | Cecum: = $\alpha$ -diversity = $\beta$ -diversity                     | Cecum: ↑ Proteobacteria<br>↑ Firmicutes<br>↓ Elusimicrobia<br>↓ Euryarchaeota   |        | Cecum: ↓ Enterococcus                                                                | Cecum: ↑ Coprococcus                                                              | ND                                                                                                                                  | Cecum: ↑ Campylobacteriales         |
| Dias 2018    | Iron biofortified carioca bean | Cornish Cross broiler chicken Male and Female Healthy | Fe (44.04 µg/g of diet) 8 weeks Sequencing                                         | ↑ BW      | ND          | ND         | Duodenum: = VH                    | Cecum: = $\alpha$ -diversity<br>Modification of $\beta$ -diversity    | Cecum: = Firmicutes<br>= Proteobacteria<br>= Tenericutes<br>= Verrucomicrobia   |        | Cecum: = Streptococcus = Ruminococcus                                                | Cecum: ↑ Blautia                                                                  | ND                                                                                                                                  | ND                                  |
| Beasley 2020 | Iron biofortified wheat        | Cornish Cross broiler chicken Male and Female Healthy | Fe (28.9 µg/g of diet) 6 weeks Sequencing                                          | =         | =           | =          | Duodenum: = VH                    | Cecum: ↓ $\alpha$ -diversity<br>Modification of $\beta$ -diversity    | Cecum: ↑ Actinobacteria<br>↓ Firmicutes<br>↓ Proteobacteria                     |        | Cecum: ↑ Bifidobacterium<br>↑ Enterococcus<br>↑ Lactobacillus                        | Cecum: ↓ Lachnospiraceae<br>↓ Coprococcus<br>↓ Ruminococcus<br>↓ Faecalibacterium | Cecum: ↑ [Acetic acid], [Propionic acid] and [Valeric acid] ↓ [Butanoic acid]                                                       | Cecum: ↓ Escherichia                |
| Dias 2019    | Iron biofortified carioca bean | Cornish Cross broiler chicken Male and Female Healthy | Fe (3.52 mg intra amniotic) 3 weeks                                                | ND        | ND          | ND         | ND                                | ND                                                                    | ND                                                                              |        | Cecum: ↓ Bifidobacterium = Lactobacillus                                             | ND                                                                                | ND                                                                                                                                  | Cecum: ↓ E.coli                     |
|              |                                |                                                       | Fe (4.32 mg intra amniotic) 3 weeks RTqPCR Bean extact                             | ND        | ND          | ND         | ND                                | ND                                                                    | ND                                                                              |        | Cecum: = Bifidobacterium<br>↑ Lactobacillus                                          | ND                                                                                | ND                                                                                                                                  | Cecum: ↑ E.coli                     |

*Table S15: Effect of minerals on the phenotype and gastro-intestinal microbiota of poultry (2/2)*

| Ref          | Intervention             | Conditions                                                  | Methods                                                      | Phenotype |             |            |                                                                                                   | Diversity | Phylum | Microbiota                                                         |                         |      |                                        |
|--------------|--------------------------|-------------------------------------------------------------|--------------------------------------------------------------|-----------|-------------|------------|---------------------------------------------------------------------------------------------------|-----------|--------|--------------------------------------------------------------------|-------------------------|------|----------------------------------------|
|              |                          |                                                             |                                                              | Weight    | Food intake | FCR or FCE | Villi structure                                                                                   |           |        | Lactic acid-producing bacteria                                     | SCFA-producing bacteria | SCFA | Pathogenic and/or Zoonotic bacteria    |
| Beasley 2020 | Iron                     | Cornish Cross broiler chicken<br>Male and Female<br>Healthy | Fe (1 mg intra amniotic)<br>3 weeks<br>RTqPCR                | ND        | ND          | ND         | Duodenum:<br>= VH                                                                                 | ND        | ND     | Cecum:<br>= Bifidobacterium<br>= Lactobacillus                     | ND                      | ND   | ND                                     |
|              |                          |                                                             | Fe-EDTA (77 µM intra amniotic)<br>3 weeks<br>RTqPCR          | ND        | ND          | ND         | Duodenum:<br>↑ VH                                                                                 | ND        | ND     | Cecum:<br>= Bifidobacterium<br>= Lactobacillus                     | ND                      | ND   | ND                                     |
|              |                          |                                                             | Fe-Nicotinamine (1.6 mM intra amniotic)<br>3 weeks<br>RTqPCR | ND        | ND          | ND         | Duodenum:<br>↑ VH                                                                                 | ND        | ND     | Cecum:<br>↑ Bifidobacterium<br>= Lactobacillus                     | ND                      | ND   | ND                                     |
| Xia 2004     | Montmorillonite          | Commercial broiler chicken<br>Male<br>Healthy               | MMT (1.5g/kg of diet)<br>7 weeks<br>Culture                  | =         | =           | =          | Jejunum:<br>↑ VH<br>= CD<br>↑ VH/CD ratio<br>Jejunum and Ileum:<br>= VH, CD and CH/CD ratio       | ND        | ND     | Small intestine and Cecum:<br>= Lactobacillus<br>= Bifidobacterium | ND                      | ND   | Small intestine and Cecum:<br>= E.coli |
|              | Cooper                   |                                                             | MMT (1.5g/kg of diet)<br>7 weeks<br>Culture                  | =         | =           | =          | Duodenum, Jejunum and Ileum:<br>= VH, CD and CH/CD ratio                                          | ND        | ND     | Small intestine and Cecum:<br>= Lactobacillus<br>= Bifidobacterium | ND                      | ND   | Small intestine and Cecum:<br>= E.coli |
|              | Montmorillonite + cooper |                                                             | MMT (1.5g/kg of diet)<br>7 weeks<br>Culture                  | ↑ BWG     | =           | ↓ FCR      | Duodenum and Ileum:<br>↑ VH<br>= CD<br>↑ VH/CD ratio<br>Jejunum:<br>↑ VH<br>↓ CD<br>↑ VH/CD ratio | ND        | ND     | Small intestine and Cecum:<br>= Lactobacillus<br>= Bifidobacterium | ND                      | ND   | Small intestine and Cecum:<br>↓ E.coli |

*Table S16: Effect of polyphenol on the phenotype and gastro-intestinal microbiota of poultry*

| Ref      | Intervention     | Conditions                                  | Methods                                           | Phenotype |             |            |                                           | Immunity                                                                             | Intestinal barrier   | Microbiota                            |                                     |
|----------|------------------|---------------------------------------------|---------------------------------------------------|-----------|-------------|------------|-------------------------------------------|--------------------------------------------------------------------------------------|----------------------|---------------------------------------|-------------------------------------|
|          |                  |                                             |                                                   | Weight    | Food intake | FCR or FCE | Villi structure                           |                                                                                      |                      | Lactic acid-producing bacteria        | Pathogenic and/or Zoonotic bacteria |
| Liu 2017 | Chestnut tannins | Ross 308 broiler chicken<br>Male<br>Healthy | Tannin (1 or 2 g/kg of diet)<br>2 weeks<br>RTqPCR | ↑ BWG     | =           | =          | Jejunum:<br>↑ VH<br>= CD<br>= VH/CD ratio | Jejunum:<br>↓ [IL-6]<br>and [NFKb]<br>↓ [MDA]<br>↑ [TAOC]<br>and [SOD]<br>= [GSH-Px] | Jejunum:<br>↑ [ZO-1] | Jejunum and Cecum:<br>= Lactobacillus | Jejunum and Cecum:<br>↓ E.coli      |

Table S17: Effect of vitamins on the phenotype and gastro-intestinal microbiota of poultry

| Ref         | Intervention | Conditions                                    | Methods                                            | Phenotype |             |            |                 | Microbiota                                 |                                          |
|-------------|--------------|-----------------------------------------------|----------------------------------------------------|-----------|-------------|------------|-----------------|--------------------------------------------|------------------------------------------|
|             |              |                                               |                                                    | Weight    | Food intake | FCR or FCE | Villi structure | Lactic acid-producing bacteria             | Pathogenic and/or Zoonotic bacteria      |
| Scocco 2016 | Vitamine E   | Ross 308 broiler chicken<br>Female<br>Healthy | Vit (150 mg/kg of diet)<br>3 or 6 weeks<br>Culture | =         | ND          | =          | ND              | Ileum and Cecum:<br>= Lactic acid bacteria | Ileum:<br>↑ E.coli<br>Cecum:<br>= E.coli |

**Abbreviations:**

BW: Body Weight

BWG: Body Weight Gain

ADG: Average Daily Gain

FI: Feed Intake

ADFI: Average Daily Feed Intake

FCR: Feed Conversion Ratio

FCE: Feed Conversion Efficiency

VH: Villi Height

CD: Crypt Depth

= No change compared with the control group

↑ Increase compared with the control group

↓ Decrease compared with the control group

ND: Not Determined

**Bibliography:**

1. Abolfathi, M.-E., Tabeidian, S.A., Foroozandeh Shahraki, A.D., Tabatabaei, S.N., Habibian, M., 2019. Comparative effects of n-hexane and methanol extracts of elecampane (*Inula helenium* L.) rhizome on growth performance, carcass traits, feed digestibility, intestinal antioxidant status and ileal microbiota in broiler chickens. *Arch. Anim. Nutr.* 73, 88–110. <https://doi.org/10.1080/1745039X.2019.1581027>
2. Adeyemi, K.D., Audu, S., Oloke, J.A., Oladiji, O.E., Salawu, K.F., Ahmed, R.A., Sulaimon, R.O., 2021. Influence of *Crescentia cujete* and *Launaea taraxacifolia* leaves on growth, immune indices, gut microbiota, blood chemistry, carcass, and meat quality in broiler chickens. *Trop. Anim. Health Prod.* 53, (22 June 2021). <https://doi.org/10.1007/s11250-021-02812-1>
3. Atterbury, R.J., Hobley, L., Till, R., Lambert, C., Capeness, M.J., Lerner, T.R., Fenton, A.K., Barrow, P., Sockett, R.E., 2011. Effects of orally administered *Bdellovibrio bacteriovorus* on the well-being and *Salmonella* colonization of young chicks. *Appl. Environ. Microbiol.* 77, 5794–5806. <https://doi.org/10.1128/AEM.00426-11>
4. Beasley, J.T., Johnson, A.A.T., Kolba, N., Bonneau, J.P., Glahn, R.P., Ozeri, L., Koren, O., Tako, E., 2020. Nicotianamine-chelated iron positively affects iron status, intestinal morphology and microbial populations in vivo (*Gallus gallus*). *Sci. Rep.* 10, 2297. <https://doi.org/10.1038/s41598-020-57598-3>
5. Bin Peng, Liu ShaoJuan, Chen Shuai, Zeng ZhaoYing, Huang RuiLin, Yin YuLong, Liu Gang, 2017. The effect of aspartate supplementation on the microbial composition and innate immunity on mice. *Amino Acids* 49, 2045–2051. <https://doi.org/10.1007/s00726-017-2467-5>
6. Cao, G.T., Zhan, X.A., Zhang, L.L., Zeng, X.F., Chen, A.G., Yang, C.M., 2018. Modulation of broilers' caecal microflora and metabolites in response to a potential probiotic *Bacillus amyloliquefaciens*. *J. Anim. Physiol. Anim. Nutr.* 102, e909–e917.
7. Chen, J., Yu, Y., 2021. *Bacillus subtilis*-fermented products ameliorate the growth performance and alter cecal microbiota community in broilers under lipopolysaccharide challenge. *Poult. Sci.* 100, 875–886. <https://doi.org/10.1016/j.psj.2020.10.070>
8. Chen, W., Zhu, X.Z., Wang, J.P., Wang, Z.X., Huang, Y.Q., 2013. Effects of *Bacillus subtilis* var. natto and *Saccharomyces cerevisiae* fermented liquid feed on growth performance, relative organ weight,

intestinal microflora, and organ antioxidant status in Landes geese. *J. Anim. Sci.* 91, 978–985.  
<https://doi.org/10.2527/jas.2012-5148>

9. Czerwiński, J., Højberg, O., Smulikowska, S., Engberg, R.M., Mieczkowska, A., 2012. Effects of sodium butyrate and salinomycin upon intestinal microbiota, mucosal morphology and performance of broiler chickens. *Arch. Anim. Nutr.* 66, 102–116.  
<https://doi.org/10.1080/1745039X.2012.663668>
10. Daneshmand, A., Kermanshahi, H., Sekhavati, M.H., Javadmanesh, A., Ahmadian, M., 2019. Antimicrobial peptide, cLF36, affects performance and intestinal morphology, microflora, junctional proteins, and immune cells in broilers challenged with *E. coli*. *Sci. Rep.* 9.  
<https://doi.org/10.1038/s41598-019-50511-7>
11. Dias, D.M., Kolba, N., Binyamin, D., Ziv, O., Regini Nutti, M., Martino, H.S.D., Glahn, R.P., Koren, O., Tako, E., 2018. Iron Biofortified Carioca Bean (*Phaseolus vulgaris* L.)-Based Brazilian Diet Delivers More Absorbable Iron and Affects the Gut Microbiota In Vivo (*Gallus gallus*). *Nutrients* 10, E1970. <https://doi.org/10.3390/nu10121970>
12. Dias, D.M., Kolba, N., Hart, J.J., Ma, M., Sha, S.T., Lakshmanan, N., Nutti, M.R., Martino, H.S.D., Glahn, R.P., Tako, E., 2019. Soluble extracts from carioca beans (*Phaseolus vulgaris* L.) affect the gut microbiota and iron related brush border membrane protein expression in vivo (*Gallus gallus*). *Food Res. Int. Ott. Ont* 123, 172–180. <https://doi.org/10.1016/j.foodres.2019.04.060>
13. Divani, A., Bagherzadeh-Kasmani, F., Mehri, M., 2018. *Plantago ovata* in broiler chicken nutrition: Performance, carcass criteria, intestinal morphology, immunity, and intestinal bacterial population. *J. Anim. Physiol. Anim. Nutr.* 102, e353–e363. <https://doi.org/10.1111/jpn.12753>
14. Fagundes, N.S., Pereira, R., Bortoluzzi, C., Rafael, J.M., Naptly, G.S., Barbosa, J.G.M., Sciencia, M.C.M., Menten, J.F.M., 2017. Replacing corn with sorghum in the diet alters intestinal microbiota without altering chicken performance. *J. Anim. Physiol. Anim. Nutr.* 101, e371–e382.  
<https://doi.org/10.1111/jpn.12614>
15. Feng, Kong FangAng, Yan Xian, Zheng LiWei, Qi QiEn, Long LiNa, Gong Li, Huang WeiLong, Zhang HuiHua, 2021. Effects of glycerol monolaurate supplementation on egg production, biochemical indices, and gut microbiota of broiler breeders at the late stage of production. *Poult. Sci.* 100. <https://doi.org/10.1016/j.psj.2021.101386>
16. Feng, X., Zhu Hui, Chen BoDong, Zhu Cui, Gong Li, Hu ZhiYong, Zhang HuiHua, 2020. Effects of phytosterols supplementation on growth performance and intestinal microflora of yellow-feather broilers. *Poult. Sci.* 99, 6022–6030. <https://doi.org/10.1016/j.psj.2020.07.036>
17. Feng Xin, Kong FangAng, Zheng LiWei, Qi QiEn, Long LiNa, Gong Li, Huang WeiLong, Zhang HuiHua, 2021. Effects of monobutylin supplementation on egg production, biochemical indexes, and gut microbiota of broiler breeders. *Poult. Sci.* 100. <https://doi.org/10.1016/j.psj.2020.11.074>
18. Fernandez, F., Hinton, M., Gils, B. van, 2002. Dietary mannan-oligosaccharides and their effect on chicken caecal microflora in relation to *Salmonella* Enteritidis colonization. *Avian Pathol.* 31, 49–58.  
<https://doi.org/10.1080/03079450120106000>
19. Gomes, M.J.C., Martino, H.S.D., Tako, E., 2021. Effects of iron and zinc biofortified foods on gut microbiota in vivo (*Gallus gallus*): a systematic review. *Nutrients* 13.  
<https://doi.org/10.3390/nu13010189>
20. Han, W., Zhang, X.L., Wang, D.W., Li, L.Y., Liu, G.L., Li, A.K., Zhao, Y.X., 2013. Effects of microencapsulated *Enterococcus faecalis* CG1.0007 on growth performance, antioxidation activity, and intestinal microbiota in broiler chickens. *J. Anim. Sci.* 91, 4374–4382.  
<https://doi.org/10.2527/jas.2012-5956>
21. Jeong, J.S., Kim, I.H., 2014. Effect of *Bacillus subtilis* C-3102 spores as a probiotic feed supplement on growth performance, noxious gas emission, and intestinal microflora in broilers. *Poult. Sci.* 93, 3097–3103. <https://doi.org/10.3382/ps.2014-04086>
22. Johansen, C.H., Bjerrum, L., Pedersen, K., 2007. Impact of salinomycin on the intestinal microflora of broiler chickens. *Acta Vet. Scand.* 49, (26 October 2007).

23. Kang, H.K., Park, S.B., Kim, C.H., 2017. Effects of dietary supplementation with a chlorella by-product on the growth performance, immune response, intestinal microflora and intestinal mucosal morphology in broiler chickens. *J. Anim. Physiol. Anim. Nutr.* 101, 208–214.  
<https://doi.org/10.1111/jpn.12566>
24. Kim, J.E., Lillehoj, H.S., Hong YeongHo, Kim GeunBae, Lee, S.H., Lillehoj, E.P., Bravo, D.M., 2015. Dietary Capsicum and Curcuma longa oleoresins increase intestinal microbiome and necrotic enteritis in three commercial broiler breeds. *Res. Vet. Sci.* 102, 150–158.  
<https://doi.org/10.1016/j.rvsc.2015.07.022>
25. Kulshreshtha, G., Rathgeber, B., Stratton, G., Thomas, N., Evans, F., Critchley, A., Hafting, J., Balakrishnan Prithiviraj, 2014. Feed supplementation with red seaweeds, *Chondrus crispus* and *Sarcodiotheca gaudichaudii*, affects performance, egg quality, and gut microbiota of layer hens. *Poult. Sci.* 93, 2991–3001. <https://doi.org/10.3382/ps.2014-04200>
26. Liu, H.W., Li, K., Zhao, J.S., Deng, W., 2018. Effects of chestnut tannins on intestinal morphology, barrier function, pro-inflammatory cytokine expression, microflora and antioxidant capacity in heat-stressed broilers. *J. Anim. Physiol. Anim. Nutr.* 102, 717–726. <https://doi.org/10.1111/jpn.12839>
27. Markazi, A., Luoma, A., Shanmugasundaram, R., Mohnl, M., Murugesan, G.R., Selvaraj, R., 2018. Effects of drinking water synbiotic supplementation in laying hens challenged with *Salmonella*. *Poult. Sci.* 97, 3510–3518. <https://doi.org/10.3382/ps/pey234>
28. Mountzouris, K.C., Palamidi, I., Paraskeuas, V., Griela, E., Fegeros, K., 2019. Dietary probiotic form modulates broiler gut microbiota indices and expression of gut barrier genes including essential components for gut homeostasis. *J. Anim. Physiol. Anim. Nutr.* 103, 1143–1159.  
<https://doi.org/10.1111/jpn.13112>
29. Nava, G.M., Attene-Ramos, M.S., Gaskins, H.R., Richards, J.D., 2009. Molecular analysis of microbial community structure in the chicken ileum following organic acid supplementation. *Vet. Microbiol.* 137, 345–353. <https://doi.org/10.1016/j.vetmic.2009.01.037>
30. Pandi, J., Glatz, P., Forder, R., Komolong, B., Chousalkar, K., 2018. Evaluation of the effects of sweet potato (*Ipomoea batatas* (L.) Lam) in broiler diets. *J. Anim. Physiol. Anim. Nutr.* 102, e216–e224.  
<https://doi.org/10.1111/jpn.12730>
31. Peinado, M.J., Echávarri, A., Ruiz, R., Suárez-Pereira, E., Ortiz Mellet, C., García Fernández, J.M., Rubio, L.A., 2013. Effects of inulin and di-D-fructose dianhydride-enriched caramels on intestinal microbiota composition and performance of broiler chickens. *Animal* 7, 1779–1788.  
<https://doi.org/10.1017/S1751731113001572>
32. Pereira, R.V.V., Carroll, L.M., Lima, S., Foditsch, C., Siler, J.D., Bicalho, R.C., Warnick, L.D., 2018. Impacts of feeding preweaned calves milk containing drug residues on the functional profile of the fecal microbiota. *Sci. Rep.* 8, 554. <https://doi.org/10.1038/s41598-017-19021-2>
33. Pineda, L., Chwalibog, A., Sawosz, E., Lauridsen, C., Engberg, R., Elnif, J., Hotowy, A., Sawosz, F., Gao YuHong, Ali, A., Moghaddam, H.S., 2012. Effect of silver nanoparticles on growth performance, metabolism and microbial profile of broiler chickens. *Arch. Anim. Nutr.* 66, 416–429.  
<https://doi.org/10.1080/1745039X.2012.710081>
34. Ptak, A., Bedford, M.R., Świątkiewicz, S., Żyła, K., Józefiak, D., 2015. Phytase modulates ileal microbiota and enhances growth performance of the broiler chickens. *PLoS ONE* 10, e0119770.  
<https://doi.org/10.1371/journal.pone.0119770>
35. Rebolé, A., Ortiz, L.T., Rodríguez, M.L., Alzueta, C., Treviño, J., Velasco, S., 2010. Effects of inulin and enzyme complex, individually or in combination, on growth performance, intestinal microflora, cecal fermentation characteristics, and jejunal histomorphology in broiler chickens fed a wheat- and barley-based diet. *Poult. Sci.* 89, 276–286. <https://doi.org/10.3382/ps.2009-00336>
36. Reda, F.M., Alagawany, M., Mahmoud, H.K., Mahgoub, S.A., Elnesr, S.S., 2020. Use of red pepper oil in quail diets and its effect on performance, carcass measurements, intestinal microbiota, antioxidant indices, immunity and blood constituents. *Anim. Int. J. Anim. Biosci.* 14, 1025–1033.  
<https://doi.org/10.1017/S1751731119002891>

37. Reed, S., Knez, M., Uzan, A., Stangoulis, J.C.R., Glahn, R.P., Koren, O., Tako, E., 2018. Alterations in the Gut (*Gallus gallus*) Microbiota Following the Consumption of Zinc Biofortified Wheat (*Triticum aestivum*)-Based Diet. *J. Agric. Food Chem.* 66, 6291–6299. <https://doi.org/10.1021/acs.jafc.8b01481>
38. Reed, S., Neuman, H., Glahn, R.P., Koren, O., Tako, E., 2017. Characterizing the gut (*Gallus gallus*) microbiota following the consumption of an iron biofortified Rwandan cream seeded carioca (*Phaseolus Vulgaris* L.) bean-based diet. *PloS One* 12, e0182431. <https://doi.org/10.1371/journal.pone.0182431>
39. Reed, S., Neuman, H., Moscovich, S., Glahn, R.P., Koren, O., Tako, E., 2015. Chronic zinc deficiency alters chick gut microbiota composition and function. *Nutrients* 7, 9768–9784. <https://doi.org/10.3390/nu7125497>
40. Rodjan, P., Soisuwan, K., Thongprajukaew, K., Theapparat, Y., Khongthong, S., Jeenkeawpieam, J., Salaeharae, T., 2018. Effect of organic acids or probiotics alone or in combination on growth performance, nutrient digestibility, enzyme activities, intestinal morphology and gut microflora in broiler chickens. *J. Anim. Physiol. Anim. Nutr.* 102, e931–e940.
41. Ruan, D., Fan QiuLi, Fouad, A.M., Sun YunYun, Huang ShengShu, Wu AiJi, Lin ChuXiao, Kuang ZhiXiang, Zhang Chang, Jiang ShouQun, 2021. Effects of dietary oregano essential oil supplementation on growth performance, intestinal antioxidative capacity, immunity, and intestinal microbiota in yellow-feathered chickens. *J. Anim. Sci.* 99. <https://doi.org/10.1093/jas/skab033>
42. Ruan, D., Fouad, A.M., Fan, Q.L., Huo, X.H., Kuang, Z.X., Wang, H., Guo, C.Y., Deng, Y.F., Zhang, C., Zhang, J.H., Jiang, S.Q., 2020. Dietary L-arginine supplementation enhances growth performance, intestinal antioxidative capacity, immunity and modulates gut microbiota in yellow-feathered chickens. *Poult. Sci.* 99, 6935–6945. <https://doi.org/10.1016/j.psj.2020.09.042>
43. Scocco, P., Forte, C., Franciosini, M.P., Mercati, F., Casagrande-Proietti, P., Dall'Aglio, C., Acuti, G., Tardella, F.M., Trabalza-Marinucci, M., 2017. Gut complex carbohydrates and intestinal microflora in broiler chickens fed with oregano (*Origanum vulgare* L.) aqueous extract and vitamin E. *J. Anim. Physiol. Anim. Nutr.* 101, 676–684. <https://doi.org/10.1111/jpn.12588>
44. Shakouri, M.D., Iji, P.A., Mikkelsen, L.L., Cowieson, A.J., 2009. Intestinal function and gut microflora of broiler chickens as influenced by cereal grains and microbial enzyme supplementation. *J. Anim. Physiol. Anim. Nutr.* 93, 647–658. <https://doi.org/10.1111/j.1439-0396.2008.00852.x>
45. Shang, H.M., Hu, T.M., Lu, Y.J., Wu, H.X., 2010. Effects of inulin on performance, egg quality, gut microflora and serum and yolk cholesterol in laying hens. *Br. Poult. Sci.* 51, 791–796. <https://doi.org/10.1080/00071668.2010.531005>
46. Shao, Y., Lei Zhao, Yuan JianMin, Yang Ying, Guo YuMing, Zhang BingKun, 2014. Effect of zinc on growth performance, gut morphometry, and cecal microbial community in broilers challenged with *Salmonella enterica* serovar typhimurium. *J. Microbiol.* 52, 1002–1011. <https://doi.org/10.1007/s12275-014-4347-y>
47. Singh, P., Karimi, A., Devendra, K., Waldroup, P.W., Cho KwangKeun, Kwon, Y.M., 2013. Influence of penicillin on microbial diversity of the cecal microbiota in broiler chickens. *Poult. Sci.* 92, 272–276. <https://doi.org/10.3382/ps.2012-02603>
48. Taha, A.E., Hassan, S.S., Shewita, R.S., El-Seidy, A.A., El-Hack, M.E.A., Hussein, E.O.S., Saadeldin, I.M., Swelum, A.A., El-Edel, M.A., 2019. Effects of supplementing broiler diets with coriander seed powder on growth performance, blood haematology, ileum microflora and economic efficiency. *J. Anim. Physiol. Anim. Nutr.* 103, 1474–1483. <https://doi.org/10.1111/jpn.13165>
49. Vase-Khavari, K., Mortezaei, S.H., Rasouli, B., Khusro, A., Salem, A.Z.M., Seidavi, A., 2019. The effect of three tropical medicinal plants and superzist probiotic on growth performance, carcass characteristics, blood constituents, immune response, and gut microflora of broiler. *Trop. Anim. Health Prod.* 51, 33–42. <https://doi.org/10.1007/s11250-018-1656-x>

50. Venardou, B., O'Doherty, J.V., Vigors, S., O'Shea, C.J., Burton, E.J., Ryan, M.T., Sweeney, T., 2021. Effects of dietary supplementation with a laminarin-rich extract on the growth performance and gastrointestinal health in broilers. *Poult. Sci.* 100. <https://doi.org/10.1016/j.psj.2021.101179>
51. Vineetha, P.G., Tomar, S., Saxena, V.K., Arun, T.S., Adil, K., 2016. Effect of laboratory isolated *Lactobacillus plantarum* LGFCP4 on growth performance, intestinal histomorphometry and gastrointestinal microflora population in guinea fowl. *Indian J. Poult. Sci.* 53, 37–43. <https://doi.org/10.5958/0974-8180.2018.00015.6>
52. Viveros, A., Chamorro, S., Pizarro, M., Arija, I., Centeno, C., Brenes, A., 2011. Effects of dietary polyphenol-rich grape products on intestinal microflora and gut morphology in broiler chicks. *Poult. Sci.* 90, 566–578. <https://doi.org/10.3382/ps.2010-00889>
53. Wang, X., Tian, Z., Azad, M.A.K., Zhang, W., Blachier, F., Wang, Z., Kong, X., 2021. Dietary supplementation with *Bacillus* mixture modifies the intestinal ecosystem of weaned piglets in an overall beneficial way. *J. Appl. Microbiol.* 130, 233–246. <https://doi.org/10.1111/jam.14782>
54. Wang, Y., Li, J., Xie, Y., Zhang, H., Jin, J., Xiong, L., Liu, H., 2021. Effects of a probiotic-fermented herbal blend on the growth performance, intestinal flora and immune function of chicks infected with *Salmonella pullorum*. *Poult. Sci.* 100. <https://doi.org/10.1016/j.psj.2021.101196>
55. Wang, Y., Yi, L., Zhao, M.L., Wu, J.Q., Wang, M.Y., Cheng, X.C., 2014. Effects of zinc-methionine on growth performance, intestinal flora and immune function in pigeon squabs. *Br. Poult. Sci.* 55, 403–408. <https://doi.org/10.1080/00071668.2014.919375>
56. Wu, D., Wu, S.B., Choct, M., Swick, R.A., 2017. Performance, intestinal microflora, and amino acid digestibility altered by exogenous enzymes in broilers fed wheat- or sorghum-based diets. *J. Anim. Sci.* 95, 740–751.
57. Wu, H., Wu, F.-T., Zhou, Q.-H., Zhao, D.-P., 2021. Comparative Analysis of Gut Microbiota in Captive and Wild Oriental White Storks: Implications for Conservation Biology. *Front. Microbiol.* 12. <https://doi.org/10.3389/fmicb.2021.649466>
58. Xia, Kong, J., Zhang GuoBing, Zhang XuXiang, Seviour, R., Kong YunHong, 2019. Effects of dietary inulin supplementation on the composition and dynamics of cecal microbiota and growth-related parameters in broiler chickens. *Poult. Sci.* 98, 6942–6953.
59. Xia, M.S., Hu, C.H., Xu, Z.R., 2004. Effects of copper-bearing montmorillonite on growth performance, digestive enzyme activities, and intestinal microflora and morphology of male broilers. *Poult. Sci.* 83, 1868–1875. <https://doi.org/10.1093/ps/83.11.1868>
60. Xie, J., Wang ZhongCheng, Cui Hu, Nie Hao, Zhang TieTao, Gao XiuHua, Qiao Yu, 2020. Effects of enzymatic hydrolysate of locust bean gum on digestibility, intestinal morphology and microflora of broilers. *J. Anim. Physiol. Anim. Nutr.* 104, 230–236. <https://doi.org/10.1111/jpn.13245>
61. Yang, C.M., Cao, G.T., Ferket, P.R., Liu, T.T., Zhou, L., Zhang, L., Xiao, Y.P., Chen, A.G., 2012. Effects of probiotic, *Clostridium butyricum*, on growth performance, immune function, and cecal microflora in broiler chickens. *Poult. Sci.* 91, 2121–2129. <https://doi.org/10.3382/ps.2011-02131>
62. Yang, W., Lee YueJia, Lu HsinYi, Chou ChungHsi, Wang ChinLing, 2019. Analysis of gut microbiota and the effect of lauric acid against necrotic enteritis in *Clostridium perfringens* and *Eimeria* side-by-side challenge model. *PLoS ONE* 14, e0205784. <https://doi.org/10.1371/journal.pone.0205784>
63. Yang, Y., Iji, P.A., Kocher, A., Mikkelsen, L.L., Choct, M., 2008. Effects of mannanoligosaccharide and fructooligosaccharide on the response of broilers to pathogenic *Escherichia coli* challenge. *Br. Poult. Sci.* 49, 550–559. <https://doi.org/10.1080/00071660802290408>
