# Supplementary material for: Effects of Major Families of Modulators on Performances and Gastrointestinal Microbiota of Poultry, Pigs and Ruminants: A Systematic Approach
Source: Microorganisms. 2023 May 31;11(6):1464. doi: 10.3390/microorganisms11061464 (PMC10300821; doi:10.3390/microorganisms11061464)
Supplement: Supplementary file 1 [file microorganisms-11-01464-s001.zip › Supplementary Data S2.pdf]

## Supplemental Data S2: Effect of Modulators on Intestinal Microbiota and Phenotype of Pigs

*Table S18: Effect of minerals on the phenotype and gastro-intestinal microbiota of pigs (1/2)*

| Ref            | Intervention                | Conditions                                                       | Methods                                                          | Phenotype |             |            |                |               |                 | Immunity                                      | Intestinal barrier                                                                                                                                                                                    | Microbiota                                              |                                                              |                                                        |                                     |
|----------------|-----------------------------|------------------------------------------------------------------|------------------------------------------------------------------|-----------|-------------|------------|----------------|---------------|-----------------|-----------------------------------------------|-------------------------------------------------------------------------------------------------------------------------------------------------------------------------------------------------------|---------------------------------------------------------|--------------------------------------------------------------|--------------------------------------------------------|-------------------------------------|
|                |                             |                                                                  |                                                                  | Weight    | Food intake | FCR or FCE | Diarrhoea rate | Digestibility | Villi structure |                                               |                                                                                                                                                                                                       | Diversity                                               | Lactic acid-producing bacteria                               | SCFA-producing bacteria                                | Pathogenic and/or Zoonotic bacteria |
| Broom 2006     | Zinc                        | Large white x Landrace x Duroc Healthy                           | ZnO (3100 mg/kg of diet) 3 weeks (post weaning)                  | =         | =           | =          | =              | ND            | ND              | Serum: = [IgG]<br>Intestinal: = [IgA]         | ND                                                                                                                                                                                                    | ND                                                      | Ileum: = Lactic acid bacteria                                | ND                                                     | Ileum: = E.coli                     |
| Wang 2018      | Conventional Zinc           | Topigs x Pietran Male and Female Healthy                         | ZnO (3200 mg/kg of diet) 1 weeks (post weaning) Culture          | ↑ ADG     | =           | =          | =              | ND            | ND              | Ileum: = TNFα, INFγ and IL-1β mRNA expression | Ileum: = transeptiheliale electric resistance in ileum<br>= tigh junction gene expression                                                                                                             | Ileum: = Richness = shanon diversity                    | Ileum: = Lactobacillus                                       | Ileum: = Clostridium XIVa                              | Ileum: ↓ E.coli                     |
|                | Alternative Zinc            |                                                                  | ZnO (294 mg/kg of diet) 1 weeks (post weaning) Culture           | ↑ ADG     | =           | =          | =              | ND            | ND              | Ileum: = TNFα, INFγ and IL-1β mRNA expression | Ileum: = transeptiheliale electric resistance in ileum<br>= tigh junction gene expression                                                                                                             | Ileum: = Richness = shanon diversity                    | Ileum: = Lactobacillus                                       | Ileum: = Clostridium XIVa                              | Ileum: = E.coli                     |
| Vahjen 2011    | Zinc oxyde                  | Landrace x Pietran Healthy                                       | ZnO (3042 mg/kg of diet) 2 weeks (post weaning) Sequencing       | ND        | ND          | ND         | ND             | ND            | ND              | ND                                            | ND                                                                                                                                                                                                    | Ileum: ↑ Richness<br>↑ Shannon index<br>↑ Simpson index | Ileum: ↓ Lactobacillus reuteri<br>↓ Lactobacillus helveticus | ND                                                     | ND                                  |
| Rattingan 2020 | Zinc oxyde                  | Boars x Large white x Landrace Male and female Healthy           | ZnO (3100 ppm) 1 week (post weaning) Sequencing                  | =         | ↑ ADFI      | =          | =              | ND            | ND              | ND                                            | ND                                                                                                                                                                                                    | ND                                                      | ND                                                           | Colon: ↓ Roseburia<br>↓ Anaerostipes<br>↓ Oscillospira | Colon: = Campylobacter              |
|                |                             | Boars x Large white x Landrace Male and female Low crude protein | ZnO (3100 ppm) 1 week (post weaning) Sequencing                  | =         | =           | =          | ↓              | ND            | ND              | ND                                            | ND                                                                                                                                                                                                    | ND                                                      | ND                                                           | Colon: ↓ Roseburia                                     | Colon: = Campylobacter              |
| Li 2021        | Cooper/Zinc Montmorillonite | Duroc x Landrace x Yorkshire Healthy                             | Zn (75 mg/kg)<br>Cu (105 mg/kg) 2 week (post weaning) Sequencing | ↑ ADG     | =           | ↑ FCE      | ↓              | ND            | ND              | ND                                            | Jejunum: = Transépthéliale resistance<br>↓ FD4 flux<br>↑ ZO-1 mRNA expression<br>↑ Claudine-1 mRNA expression<br>Colon: ↑ TER<br>↓ FD4 flux<br>↑ ZO-1 mRNA expression<br>↑ Claudine-1 mRNA expression | = α diversity                                           | Colon: ↑ Lactococcus                                         | ND                                                     | ND                                  |

*Table S18: Effect of minerals on the phenotype and gastro-intestinal microbiota of pigs (2/2)*

| Ref        | Intervention                   | Conditions                                           | Methods                                                                               | Phenotype |             |            |                |                                                    |                                                                                                   | Immunity                  | Intestinal barrier | Microbiota |                                                          |                                   |                                           |
|------------|--------------------------------|------------------------------------------------------|---------------------------------------------------------------------------------------|-----------|-------------|------------|----------------|----------------------------------------------------|---------------------------------------------------------------------------------------------------|---------------------------|--------------------|------------|----------------------------------------------------------|-----------------------------------|-------------------------------------------|
|            |                                |                                                      |                                                                                       | Weight    | Food intake | FCR or FCE | Diarrhoea rate | Digestibility                                      | Villi structure                                                                                   |                           |                    | Diversity  | Lactic acid-producing bacteria                           | SCFA-producing bacteria           | Pathogenic and/or Zoonotic bacteria       |
| Kim 2021   | Cooper                         |                                                      | CuSO <sub>4</sub> (125 ppm) 4 week Culture                                            | =         | =           | =          | ND             | =                                                  | Duodenum, jejunum and ileum: = VH = CD = VH/CD ratio                                              | Duodenum: ↑ Atox 1 ↑ SOD1 | ND                 | ND         | Ileum and Cecum: = Lactobacillus Colon: ↑ Lactobacillus  | ND                                | Ileum, cecum and colon: ↓ E.coli          |
|            | Copper (Hot-Melt extruded)     | Duroc x Landrace x Yorkshire Male and Female Healthy | HME-Cu (125 ppm) 4 week Culture                                                       | ↑ ADG     | =           | =          | ND             | ↑ Gross energy digestibility                       | Ileum: = VH = CD = VH/CD ratio Duodenum: ↑ VH = CD = VH/CD ratio Jejunum: ↑ VH ↑ CD ↑ VH/CD ratio | Duodenum: ↑ Atox 1        | ND                 | ND         | Ileum: = Lactobacillus Caecum and Colon: ↑ Lactobacillus | ND                                | Ileum, cecum and colon: ↓ E.coli          |
|            | Cooper chalted with methionine |                                                      | Cu (125 ppm) 4 week Culture                                                           | ↑ ADG     | =           | =          | ND             | ↑ Gross energy digestibility                       | Duodenum and Ileum: = VH = CD = VH/CD ratio Jejunum: ↑ VH ↓ CD ↑ VH/CD ratio                      | Duodenum: ↑ Atox 1        | ND                 | ND         | Ileum, Caecum and Colon: ↑ Lactobacillus                 | ND                                | Ileum: = E.coli Cecum and colon: ↓ E.coli |
| Heyer 2019 | Calcium and phosphore          | Landrace x Pietran Healthy                           | Ca (8,3g/kg of diet) P (7.5 g/kg of diet) Diet: Corn and soybean 9 week Sequencing    | ND        | ND          | ND         | ND             | ↑ Phosphorus digestibility ↓ Calcium digestibility | ND                                                                                                | ND                        | ND                 | ND         | Cecum and Colon: ↑ Lactobacillus = Bifidobacterium       | Colon: ↓ Clostridium cluster XIVa | ND                                        |
|            |                                |                                                      | Ca (8,3g/kg of diet) P (7.5 g/kg of diet) Diet: Corn and fiels peas 9 week Sequencing | ND        | ND          | ND         | ND             | ↓ Calcium digestibility                            | ND                                                                                                | ND                        | ND                 | ND         | Cecum and Colon: ↑ Lactobacillus = Bifidobacterium       | Colon: ↓ Clostridium cluster XIVa | ND                                        |
| Lv 2015    | Sodium Selenium                | Yorkshire x Landrace x Duroc Healthy                 | Na (0.46mg/kg of diet) 6 week (post weaning) Culture                                  | ↑ ADG     | =           | ↓ FCR      | ↓              | ND                                                 | ND                                                                                                | Blood: ↑ GPx acticity     | ND                 | ND         | Feces: = Lactobacillus = Bifidobacterium = Enterococcus  | ND                                | Feces: = E.coli                           |

*Table S19: Effect of polyphenol on the phenotype and gastro-intestinal microbiota of pigs*

| Ref        | Intervention     | Conditions                                  | Methods                                                  | Phenotype |             |            |                                               | Microbiota                       |                                                           |                                           |                              |                                                             |
|------------|------------------|---------------------------------------------|----------------------------------------------------------|-----------|-------------|------------|-----------------------------------------------|----------------------------------|-----------------------------------------------------------|-------------------------------------------|------------------------------|-------------------------------------------------------------|
|            |                  |                                             |                                                          | Weight    | Food intake | FCR or FCE | Villi structure                               | Phylum                           | Lactic acid-producing bacteria                            | SCFA-producing bacteria                   | pH                           | SCFA                                                        |
| Wu 2017    | Chlorogenic acid | Yorkshire x Landrace x Duroc Healthy        | CA (0.05% of diet) 9 weeks Sequencing                    | ND        | ND          | ND         | ND                                            | Small intestine: ↑ Acidobacteria | Small intestine: ↓ Enterococcus = Lactobacillus           | Small intestine: = Roseburia = Prevotella | ND                           | ND                                                          |
| Biagi 2010 | Tannins          | Landrace x Pietrain Male and Female Healthy | Tanins (4.5 g/kg of diet) 4 weeks (post weaning) Culture | ↑ ADG     | =           | ↓ FCR      | Jejunum and Cecum: = VH = CD Ileum: = VH ↓ CD | ND                               | Jejunum and Cecum: = Lactobacillus Caecum: = Enterococcus | ND                                        | = (Ileum, Cecum and Jejunum) | Cecum: = Total SCFA = [butyrate] = [acetate] = [propionate] |

*Table S20: Effect of immunoglobulin on the phenotype and gastro-intestinal microbiota of pigs*

| Ref      | Intervention | Conditions                           | Methods                                   | Phenotype |             |            |                | Immunity                                                                      | Intestinal barrier                                   | Microbiota                                                                       |                                       |                                           |
|----------|--------------|--------------------------------------|-------------------------------------------|-----------|-------------|------------|----------------|-------------------------------------------------------------------------------|------------------------------------------------------|----------------------------------------------------------------------------------|---------------------------------------|-------------------------------------------|
|          |              |                                      |                                           | Weight    | Food intake | FCR or FCE | Diarrhoea rate |                                                                               |                                                      | Lactic acid-producing bacteria                                                   | SCFA-producing bacteria               | Pathogenic and/or Zoonotic bacteria       |
| Tan 2019 | IgY          | Yorkshire x Landrace x Duroc Healthy | Ig (500 ppm) 2 week (post weaning) RTqPCR | =         | =           | =          | ↓              | Jejunum: = IL-1 $\beta$ , IL-6, INF $\gamma$ and TNF $\alpha$ mRNA expression | Jejunum: = Claudine-1 and Occludin-1 mRNA expression | Ileum, Cecum and Colon: = Lactobacillus = Bifidobacterium Caecum: ↓ Enterococcus | Ileum, Cecum and Colon: = Clostridium | Ileum: ↓ E.coli Cecum and Colon: = E.coli |

*Table S21: Effect of probiotics on the phenotype and gastro-intestinal microbiota of pigs (1/2)*

| Ref            | Intervention                                                                                  | Conditions                                           | Methods                                                                                                                                                                                                           | Phenotype     |             |            |                |                                                        |                 | Immunity                                  | Microbiota                                                                          |                                                                          |                                                                                                            |                                                            |                                     |
|----------------|-----------------------------------------------------------------------------------------------|------------------------------------------------------|-------------------------------------------------------------------------------------------------------------------------------------------------------------------------------------------------------------------|---------------|-------------|------------|----------------|--------------------------------------------------------|-----------------|-------------------------------------------|-------------------------------------------------------------------------------------|--------------------------------------------------------------------------|------------------------------------------------------------------------------------------------------------|------------------------------------------------------------|-------------------------------------|
|                |                                                                                               |                                                      |                                                                                                                                                                                                                   | Weight        | Food intake | FCR or FCE | Diarrhoea rate | Digestibility                                          | Villi structure |                                           | Diversity                                                                           | Phylum                                                                   | Lactic acid-producing bacteria                                                                             | SCFA-producing bacteria                                    | Pathogenic and/or Zoonotic bacteria |
| Wang 2016      | Enterococcus faecium                                                                          | Large White x Landrace x Duroc Healthy               | Enterococcus (6.10 <sup>8</sup> cfu/mL) 3 weeks (after birth) Sequencing                                                                                                                                          | ↑ BW<br>↑ BWG | ND          | ND         | ↓              | ND                                                     | ND              | ND                                        | Cecum<br>↑ Richness                                                                 | Cecum:<br>↑ Bacteroidetes<br>↓ Proteobacteria<br>↓ Actinobacteria        | Cecum:<br>= Lactobacillus<br>= Enterococcus                                                                | Cecum:<br>↑ Bacteroides<br>↑ Faecalibacterium<br>↓ Blautia | ND                                  |
| Broom 2006     | Enterococcus faecium                                                                          | Large White x Landrace x Duroc Healthy               | Enterococcus (1.4.10 <sup>9</sup> cfu/mL) 3 weeks (after weaning) Sequencing                                                                                                                                      | =             | =           | =          | ND             | ND                                                     | ND              | Serum:<br>= [IgG]<br>Intestin:<br>= [IgA] | ND                                                                                  | ND                                                                       | Ileum:<br>= Lactic acid bacteria                                                                           | ND                                                         | Ileum:<br>= E.coli                  |
| Brousseau 2015 | Pedococcus acidilactici                                                                       | Yorkshire x Landrace Healthy                         | Probiotic (2.5.10 <sup>9</sup> cfu then 3.5.10 <sup>9</sup> cfu per day in utero and 6.10 <sup>9</sup> cfu per day from birth to weaning) 7 weeks Culture                                                         | ND            | ND          | ND         | ND             | ND                                                     | ND              | ND                                        | Ileum:<br>↓ $\alpha$ -diversity<br>↓ Evenness<br>Modification of $\beta$ -diversity | Ileum:<br>↑ Firmicutes<br>↓ Actinobacteria<br>Colon:<br>↑ Actinobacteria | Feces:<br>↑ Bifidobacterium<br>↓ Lactobacillus<br>Ileum and Colon:<br>= Bifidobacterium<br>= Lactobacillus | ND                                                         | ND                                  |
|                | Saccharomyces cerevisiae                                                                      |                                                      |                                                                                                                                                                                                                   | ND            | ND          | ND         | ND             | ND                                                     | ND              | ND                                        | Ileum:<br>↑ $\alpha$ -diversity<br>↑ Evenness<br>= $\beta$ -diversity               | Ileum:<br>↑ Firmicutes<br>Feces:<br>↑ Actinobacteria                     | Feces, Ileum and Colon:<br>= Bifidobacterium<br>= Lactobacillus                                            | ND                                                         | ND                                  |
|                | Pedococcus acidilactici + Saccharomyces cerevisiae                                            |                                                      |                                                                                                                                                                                                                   | ND            | ND          | ND         | ND             | ND                                                     | ND              | ND                                        | Ileum:<br>= $\alpha$ -diversity<br>= Evenness<br>Modification of $\beta$ -diversity | Ileum, colon and Feces:<br>=                                             | Feces, Ileum and Colon:<br>= Bifidobacterium<br>= Lactobacillus                                            | ND                                                         | ND                                  |
| Lan 2016       | Bacillus coagulance + Bacillus licheniformis + Bacillus subtilis + Clostridium butyricum      | Landrace x Yorkshire Male and Female Healthy         | Probiotic (0.1% of diet) 6 weeks Culture                                                                                                                                                                          | ↑ BW<br>↑ ADG | =           | ↓          | = fecal score  | ↑ Dry matter, Gross energy and nitrogene digestibility | ND              | Blood:<br>= % lymphocytes                 | ND                                                                                  | ND                                                                       | Feces:<br>↑ Lactobacillus                                                                                  | ND                                                         | Feces:<br>↓ E.coli                  |
| Choi 2011      | Lactobacillus acidophilus + Bacillus subtilis + Saccharomyces cerevisiae + Aspergillus oryzae | Landrace x Yorkshire x Duroc Male and Female Healthy | Probiotic (4.10 <sup>8</sup> cfu/g of L. acidophilus, 4.8.10 <sup>9</sup> cfu/g of B. subtilis, 10 <sup>7</sup> cfu/g of S. cerevisiae, and 4.3.10 <sup>7</sup> cfu/g of A. oryzae) 4 weeks (after birth) Culture | ↑ ADG         | ↑ ADFI      | ↓          | ND             | ↑ Dry matter                                           | ND              | ND                                        | ND                                                                                  | ND                                                                       | Feces:<br>= Lactobacillus                                                                                  | ND                                                         | ND                                  |

**Table S21: Effect of probiotics on the phenotype and gastro-intestinal microbiota of pigs (2/2)**

| Ref               | Intervention                                         | Conditions                                                                                                                  | Methods                                                                                                                             | Phenotype |             |            |                |                                                            |                                                                                                   | Immunity                                                                                | Microbiota           |                                                                     |                                                                                   |                         |                                            |
|-------------------|------------------------------------------------------|-----------------------------------------------------------------------------------------------------------------------------|-------------------------------------------------------------------------------------------------------------------------------------|-----------|-------------|------------|----------------|------------------------------------------------------------|---------------------------------------------------------------------------------------------------|-----------------------------------------------------------------------------------------|----------------------|---------------------------------------------------------------------|-----------------------------------------------------------------------------------|-------------------------|--------------------------------------------|
|                   |                                                      |                                                                                                                             |                                                                                                                                     | Weight    | Food intake | FCR or FCE | Diarrhoea rate | Digestibility                                              | Villi structure                                                                                   |                                                                                         | Diversity            | Phylum                                                              | Lactic acid-producing bacteria                                                    | SCFA-producing bacteria | Pathogenic and/or Zoonotic bacteria        |
| Lv 2015           | Lactobacillus acidophilus + Saccharomyces cerevisiae | Landrace x Yorkshire x Duroc Healthy                                                                                        | Probiotic (3.10 <sup>11</sup> cfu/g of L. acidophilus and 3.10 <sup>7</sup> cfu/g of S. cerevisiae) 6 weeks (after weaning) Culture | ↑ ADG     | =           | ↓          | ↓              | ND                                                         | ND                                                                                                | Blood = GPX activity                                                                    | ND                   | ND                                                                  | Feces: ↑ Lactobacillus = Bifidobacterium = Enterococcus                           | ND                      | Feces: ↓ E.coli                            |
| Wang 2019         | Lactobacillus plantarum                              | Landrace x Yorkshire Healthy                                                                                                | Probiotic (10 <sup>10</sup> CFU/2mL) 3 weeks (after birth) Sequencing                                                               | =         | ND          | ND         | ↓              | ND                                                         | Duodenum: = VH = CD = VH/CD ratio Ileum: = VH = CD = VH/CD ratio Jejunum: = VH = CD = VH/CD ratio | ND                                                                                      | Colon: = α-diversity | Colon: ↑ Firmicutes ↑ Actinobacteria ↓ Bacteroidetes ↓ Fusobacteria | Colon: ↑ Lactobacillus                                                            | Colon: ↓ Fusobacterium  | Colon: ↓ Escherichia-shigella              |
| Shen 2009         | Yeast                                                | Large white x Landrace Healthy                                                                                              | Probiotic (5g/kg) 3 weeks (after weaning) Culture                                                                                   | =         | =           | =          | ND             | ↑ Gross energy, Dry matter and crude protein digestibility | Jejunum: ↑ VH = CD = VH/CD ratio Ileum and Duodenum: = CD, VH and CD/VH ratio                     | Plasma: = % lymphocyte CD4+ and CD8+ ↓ [INFγ] in plasma = [IL10] Gut: = [IL10] ↑ [INFγ] | ND                   | ND                                                                  | Cecum, Colon and Rectum: = Lactobacillus                                          | ND                      | Cecum: ↓ E.coli Colon and Rectum: = E.coli |
| Hosseindoust 2016 | Bacteriophage                                        | Landrace x Yorkshire x Duroc Male and Female Healthy                                                                        | Probiotic (1g/kg of diet) 5 weeks (after birth) Culture                                                                             | =         | =           | =          | ↓              | = Digestibility                                            | Jejunum: ↑ VH = CD = VH/CD ratio Duodenum and Ileum: = VH = CD = VH/CD ratio                      | Serum: = [Ig]                                                                           | ND                   | ND                                                                  | Cecum: = Lactobacillus ↑ Bifidobacterium Ileum: ↑ Lactobacillus = Bifidobacterium | ND                      | ND                                         |
|                   |                                                      | Landrace x Yorkshire x Duroc Male and Female Salmonella typhimurium, enteritidis and choleraesuis, E.coli and C.perfringens | Probiotic (1g/kg of diet) 5 weeks (after birth) Culture Infection: ND                                                               | =         | =           | ↓          | ↓              | = Digestibility                                            | Jejunum: ↑ VH = CD = VH/CD ratio Duodenum and Ileum: = VH = CD = VH/CD ratio                      | Serum: = [Ig]                                                                           | ND                   | ND                                                                  | Cecum: = Lactobacillus ↑ Bifidobacterium Ileum: ↑ Lactobacillus = Bifidobacterium | ND                      | ND                                         |

**Table S22: Effect of probiotics combined with other interventions on the phenotype and gastro-intestinal microbiota of pigs**

| Ref           | Intervention                                                       | Conditions                           | Methods                                                                                                                                         | Phenotype     |             |            |                | Immunity              | Microbiota                  |                                                         |                                       | Pathogenic and/or Zoonotic bacteria |
|---------------|--------------------------------------------------------------------|--------------------------------------|-------------------------------------------------------------------------------------------------------------------------------------------------|---------------|-------------|------------|----------------|-----------------------|-----------------------------|---------------------------------------------------------|---------------------------------------|-------------------------------------|
|               |                                                                    |                                      |                                                                                                                                                 | Weight        | Food intake | FCR or FCE | Diarrhoea rate |                       | Diversity                   | Lactic acid-producing bacteria                          | SCFA-producing bacteria               |                                     |
| Lv 2015       | Lactobacillus acidophilus + Saccharomyces cerevisiae + Na-Selenium | Yorkshire x Landrace x Duroc Healthy | Na (0.46mg/kg of diet) Probiotic (3.1011 cfu/g of L. acidophilus and 3.109 cfu/g of S. cerevisiae) 6 week (post weaning) Culture                | ↑ BW<br>↑ ADG | =           | ↓ FCR      | ↓              | Blood: ↑ GPx activity | ND                          | Feces: ↑ Lactobacillus = Bifidobacterium = Enterococcus | ND                                    | Feces: ↓ E.coli                     |
| Lo verso 2020 | Cranberry + Carvacrol + Yeast + Vitamins A,D,E and B complex       | Yorkshire x Landrace x Duroc Healthy | Cranberry (1g/kg of diet) Carvacrol (0.1 g/kg of diet) Yeast (5g/kg of diet) Vitamins complex (3g/kg of diet) 6 weeks (post weaning) Sequencing | =             | =           | =          | ND             | ND                    | = α diversity = β diversity | Colon: ↓ Lactobacillus amylovorus                       | Colon: = Faecalibacterium prausnitzii | ND                                  |

Table S23: Effect of postbiotics on the phenotype and gastro-intestinal microbiota of pigs

| Ref               | Intervention                                            | Conditions                                        | Methods                                                                              | Phenotype  |             |            |                                              |                                                   | Lactic acid-producing bacteria | SCFA-producing bacteria | Microbiota                                    |                                                                                                                            |                                                    |
|-------------------|---------------------------------------------------------|---------------------------------------------------|--------------------------------------------------------------------------------------|------------|-------------|------------|----------------------------------------------|---------------------------------------------------|--------------------------------|-------------------------|-----------------------------------------------|----------------------------------------------------------------------------------------------------------------------------|----------------------------------------------------|
|                   |                                                         |                                                   |                                                                                      | Weight     | Food intake | FCR or FCE | Digestibility                                | Villi structure                                   |                                |                         | pH                                            | SCFA                                                                                                                       | Pathogenic and/or Zoonotic bacteria                |
| Biagi 2007        | Sodium Butyrate                                         | German Landrace x Pietrain Healthy                | Postbiotic (4000 ppm) 4 weeks (post weaning) Culture                                 | =          | =           | =          | ND                                           | Jejunum, Ileum and Cecum: = VH = CD = VH/CD ratio | ND                             | ND                      | ND                                            | Jejunum, Ileum and Cecum: = [Acetate], [Propionate], [Butyrate], [Lactate]                                                 | ND                                                 |
| Hanczakowska 2013 | Propionic acid + Formic acid                            | Landrace x Large white x Duroc x Pietrain Healthy | Postbiotic (0.5% of diet) 1 weeks (post weaning) Culture                             | =          | ND          | =          | =                                            | Ileum: = VH ↑ CD = VH/CD ratio                    | ND                             | ND                      | = Stomach, Duodenum, Jejunum, Ileum and Cecum | Ileum: ↑ [Valerate] = [Acetate] = [Propionate] = [Butyrate] Cecum: ↑ [Isobutyrate] = [Acetate] = [Propionate] = [Butyrate] | Ileum: = E.coli = C. perfringens                   |
|                   | Caprylic acid + Propionic acid and Formic acid          |                                                   | Caprylic acid (0.2% of diet) Propionic of formic acid (0.5% of diet) 11 week Culture | ↑ BW ↑ BWG | ND          | =          | ↑ Crude fiber digestibility                  | Ileum: = VH = VH/CD ratio ↑ VW ↑ CD               | ND                             | ND                      | ↑ (stomach)                                   | Cecum: ↑ [butyric] ↑ [valeric]                                                                                             | Ileum: = E.coli = C.perfringens = Candida albicans |
|                   | Capric acid + Propionic acid and Formic acid            |                                                   |                                                                                      | ↑ BW ↑ BWG | ND          | =          | ↑ Crude fiber, protein and fat digestibility | Ileum: ↑ VH = VH/CD ratio ↑ VW ↑ CD               | ND                             | ND                      | ↑ (stomach) ↓ (jejunum)                       | Cecum: ↑ [butyric]                                                                                                         | Ileum: = E.coli = C.perfringens = Candida albicans |
|                   | Caprylic + Capric acid + Propionic acid and Formic acid |                                                   |                                                                                      | ↑ BW ↑ BWG | ND          | =          | ↑ Crude fat digestibility                    | Ileum: = VH = VH/CD ratio ↑ VW = CD               | ND                             | ND                      | ↑ (stomach)                                   | Cecum: = [SCFA]                                                                                                            | Ileum: = E.coli = C.perfringens = Candida albicans |

Table S24: Effect of infection on the phenotype and gastro-intestinal microbiota of pigs

| Ref               | Infection                                                                                                        | Conditions                                   | Methods                                      | Phenotype |             |            |                |               |                                                      | Immunity       | Microbiota                                                                        |                                     |
|-------------------|------------------------------------------------------------------------------------------------------------------|----------------------------------------------|----------------------------------------------|-----------|-------------|------------|----------------|---------------|------------------------------------------------------|----------------|-----------------------------------------------------------------------------------|-------------------------------------|
|                   |                                                                                                                  |                                              |                                              | Weight    | Food intake | FCR or FCE | Diarrhoea rate | Digestibility | Villi structure                                      |                | Lactic acid-producing bacteria                                                    | Pathogenic and/or Zoonotic bacteria |
| Hosseindoust 2016 | <i>Salmonella typhimurium</i> , <i>enteritidis</i> and <i>cholerasuis</i> + <i>E.coli</i> + <i>C.perfringens</i> | Landrace x Yorkshire x Duroc Male and Female | Infection (ND) 5 weeks (after birth) Culture | ↓ ADG     | ↓ ADFI      | =          | ↑              | =             | Duodenum, Jejunum and Ileum: = VH = CD = VH/CD ratio | Serum: ↑ [IgA] | Cecum: = Lactobacillus ↓ Bifidobacterium Ileum: ↓ Lactobacillus = Bifidobacterium | ND                                  |

**Table S25: Effect of prebiotics on the phenotype and gastro-intestinal microbiota of pigs**

| Ref            | Intervention | Conditions                                                            | Methods                                                           | Phenotype |             |            |                |                                                           | Immunity                                                     | Microbiota                                    |                                     |                                          |                                  |           |                                         |                                                  |
|----------------|--------------|-----------------------------------------------------------------------|-------------------------------------------------------------------|-----------|-------------|------------|----------------|-----------------------------------------------------------|--------------------------------------------------------------|-----------------------------------------------|-------------------------------------|------------------------------------------|----------------------------------|-----------|-----------------------------------------|--------------------------------------------------|
|                |              |                                                                       |                                                                   | Weight    | Food intake | FCR or FCE | Diarrhoea rate | Villi structure                                           |                                                              | Diversity                                     | Phylum                              | Lactic acid-producing bacteria           | SCFA-producing bacteria          | pH        | SCFA                                    | Pathogenic and/or Zoonotic bacteria              |
| Li 2018        | Inulin       | Pietran x Landrace Male and Female Healthy                            | Prebiotic (0.4 to 3 g/animal/day) 7 week (post birth) RTqPCR      | ↑ BW      | ND          | ND         | ND             | Jejunum: ↑ VH = CD = VH/CD Ileum: ↑ VH ↑ CD ↓ VH/CD ratio | Colon: ↓ IL8, TNFα and TLR4 mRNA expression                  | ND                                            | Colon: = Firmicutes = Bacteroidetes | Colon: = Lactobacillus = Bifidobacterium | Colon: = Clostridium XI Va       | ND        | Cecum: = Total SCFA Colon: ↓ Total SCFA | Colon: = E.coli                                  |
| Tian 2019      | GOS          | Duroc x Landrace x Large white Healthy                                | Prebiotic (1g/kg of BW) 3 week (post birth) Sequencing            | ND        | ND          | ND         | ND             | ND                                                        | Ileum ↑ IL10 and PBD-A mRNA expression = IL8 mRNA expression | = α-diversity Modification of the β-diversity | Ileum: ↑ Firmicute ↓ Bacteroidetes  | Ileum: ↑ Lactobacillus                   | ND                               | = (Ileum) | Ileum: ↑ [Butyrate] = [Lactate]         | Ileum: ↓ Escherichia ↓ Clostridium sensu stricto |
| Rattingan 2020 | Laminarin    | Boars x Landrace x Large white Male and Female Healthy                | Prebiotic (300ppm) Protein (21%) 1 week (post weaning) Sequencing | =         | =           | =          | =              | ND                                                        | ND                                                           | = α-diversity = Richness                      | Colon: = Firmicute = Protéobacteria | ND                                       | Colon: = Roseburia = Bacteroides | ND        | Cecum and Colon: = Total SCFA           | Colon: = Campylobacter                           |
|                |              | Boars x Landrace x Large white Male and Female Reducing crude protein | Prebiotic (300ppm) Protein (18%) 1 week (post weaning) Sequencing | =         | ↑           | =          | ↓              | ND                                                        | ND                                                           | = α diversity = Richness                      | Colon: = Firmicute = Protéobacteria | ND                                       | Colon: = Roseburia = Bacteroides | ND        | Cecum and Colon: = Total SCFA           | Colon: = Campylobacter                           |

**Table S26: Effect of fibres on the phenotype and gastro-intestinal microbiota of pigs**

| Ref      | Intervention               | Conditions                                    | Methods                                      | Phenotype |             |            |  | Immunity                  | Microbiota                                    |                        |                                     |                                                                   |                                    | Pathogenic and/or Zoonotic bacteria |
|----------|----------------------------|-----------------------------------------------|----------------------------------------------|-----------|-------------|------------|--|---------------------------|-----------------------------------------------|------------------------|-------------------------------------|-------------------------------------------------------------------|------------------------------------|-------------------------------------|
|          |                            |                                               |                                              | Weight    | Food intake | FCR or FCE |  |                           | Diversity                                     | Phylum                 | Lactic acid-producing bacteria      | SCFA-producing bacteria                                           | SCFA                               |                                     |
| Wu 2020  | 50% guar gum 50% cellulose | Yorkshire x Landrace Female Pregnante         | Prebiotic (3% of feed) 17 week Sequencing    | ND        | ND          | ND         |  | Serum: ↓ [INFγ] ↑ [IL-10] | ↑ α diversity Modification of the β diversity | Feces: ↑ Bacteroidetes | Feces: = Enterococcus = Lactococcus | Feces: ↑ Roseburia ↑ Bacteroides = Faecalibacterium = Akkermansia | Feces: ↑ [Butyrate] ↑ [Propionate] | ND                                  |
| Yan 2016 | Amylose                    | Yorkshire x Landrace x Duroc Female Pregnante | Prebiotic (54,5/100g of diet) 11 week RTqPCR | ND        | ND          | ND         |  | ND                        | ↑ richness                                    | ND                     | Feces: = Bifidobacterium            | Feces: = Bacteroidetes                                            | ND                                 | ND                                  |

**Table S27: Effect of amino acids on the phenotype and gastro-intestinal microbiota of pigs**

| Ref        | Intervention          | Conditions                            | Methods                                            | Phenotype |             |            |  | Immunity                                                          | Intestinal barrier                     | Microbiota                                    |                                                                                   |                                                                            |                         |                                                             |
|------------|-----------------------|---------------------------------------|----------------------------------------------------|-----------|-------------|------------|--|-------------------------------------------------------------------|----------------------------------------|-----------------------------------------------|-----------------------------------------------------------------------------------|----------------------------------------------------------------------------|-------------------------|-------------------------------------------------------------|
|            |                       |                                       |                                                    | Weight    | Food intake | FCR or FCE |  |                                                                   |                                        | Diversity                                     | Phylum                                                                            | Lactic acid-producing bacteria                                             | SCFA-producing bacteria | Pathogenic and/or Zoonotic bacteria                         |
| Chang 2021 | 5-Aminolevulinic acid | Landrace x Large white Female Healthy | AA (50 mg/kg of diet) 4 weeks Sequencing           | ND        | ND          | ND         |  | ND                                                                | ND                                     | = α diversity Modification of the β diversity | Feces: = phylum abundance                                                         | ND                                                                         | ND                      | ND                                                          |
| Xu 2014    | N acetyl cysteine     | Landrace x Duroc Healthy              | AA (500 mg/kg of diet) 3 weeks (Post birth) RTqPCR | ND        | ND          | ND         |  | Colon: ↑ [T-AOC], [GPx] ↓ [MDA] and [NO] Caecum: ↑ [T-AOC], [SOD] | ND                                     | ND                                            | ND                                                                                | Ileum and Colon: ↑ Lactobacillus Ileum, Cecum and Colon: ↑ Bifidobacterium | ND                      | Ileum and Cecum: ↓ E.coli                                   |
| Li 2019    | D Aspartate           |                                       |                                                    | ↓ ADG     | =           | =          |  | Blood: ↓ [IgM]                                                    | Ileum: ↓ TLR4 and NOD1 mRNA expression | = Evenesse, Richnesse and α diversity         | Ileum: = Phylum abundance                                                         | Ileum = Lactobacillus = Pediococcus                                        | ND                      | Ileum: = Escherichia shigella ↑ Clostridium sensu stricto 1 |
|            | L Aspartate           | Landrace x Duroc x Yorkshire Healthy  | AA (1% of diet) 5 weeks (Post weaning) Sequencing  | =         | =           | =          |  | Blood: = [IgM]                                                    | Ileum: ↓ NOD1 mRNA expression          | ↑ Shanon and simpson indice                   | Ileum: ↑ Chloroflexi, ↑ Nitrospirae ↑ Germatimonadetes ↑ Acidobacteria ↑ Chlorobi | Ileum ↓ Lactobacillus ↓ Pediococcus                                        | ND                      | Ileum: ↓ Escherichia shigella = Clostridium sensu stricto 1 |
|            | D and L Aspartate     |                                       |                                                    | =         | =           | =          |  | Blood: ↑ [IgM]                                                    | Ileum: ↓ TLR4 and NOD1 mRNA expression | ↑ Simpson index                               | Ileum: ↓ Protéobacteria                                                           | Ileum = Lactobacillus = Pediococcus                                        | ND                      | Ileum: = Clostridium sensu stricto 1 ↓ Escherichia shigella |

**Table S28: Effect of proteins on the phenotype and gastro-intestinal microbiota of pigs**

| Ref            | Intervention | Conditions                                             | Methods                                        | Phenotype |             |            |                | Diversity                          | Phylum                                    | Microbiota                     |                                        |                                  | Pathogenic and/or Zoonotic bacteria |
|----------------|--------------|--------------------------------------------------------|------------------------------------------------|-----------|-------------|------------|----------------|------------------------------------|-------------------------------------------|--------------------------------|----------------------------------------|----------------------------------|-------------------------------------|
|                |              |                                                        |                                                | Weight    | Food intake | FCR or FCE | Diarrhoea rate |                                    |                                           | Lactic acid-producing bacteria | SCFA-producing bacteria                | SCFA                             |                                     |
| Rattingan 2020 | Protein      | Boars x Landrace x Large white Male and Female Healthy | Protein (21%) 1 week (post weaning) Sequencing | =         | =           | =          | =              | = $\alpha$ diversity<br>= Richness | Colon:<br>= Firmicute<br>↑ Protéobacteria | ND                             | Colon:<br>= Roseburia<br>= Bacteroides | Cecum and Colon:<br>= Total SCFA | Colon:<br>= Campylobacter           |

**Table S29: Effect of antibiotics on the phenotype and gastro-intestinal microbiota of pigs**

| Intervention                  | Conditions                                           | Methods                                                           | Phenotype |             |            |                |                                                                                                  | Immunity                                                                 | Diversity                                                                         | Phylum                                                                             | Microbiota                                                                        |                                                                                                             |                                     |
|-------------------------------|------------------------------------------------------|-------------------------------------------------------------------|-----------|-------------|------------|----------------|--------------------------------------------------------------------------------------------------|--------------------------------------------------------------------------|-----------------------------------------------------------------------------------|------------------------------------------------------------------------------------|-----------------------------------------------------------------------------------|-------------------------------------------------------------------------------------------------------------|-------------------------------------|
|                               |                                                      |                                                                   | Weight    | Food intake | FCR or FCE | Diarrhoea rate | Villi structure                                                                                  |                                                                          |                                                                                   |                                                                                    | Lactic acid-producing bacteria                                                    | SCFA-producing bacteria                                                                                     | Pathogenic and/or Zoonotic bacteria |
| Chlortetracycline             | Landrace x Yorkshire x Duroc Male and Female Healthy | Antibiotic (0.10% of diet) 4 weeks (after birth) Culture          | ↑ ADG     | ↑ ADFI      | ↓ FCR      | ND             | ND                                                                                               | ND                                                                       | ND                                                                                | ND                                                                                 | Feces:<br>= Lactobacillus                                                         | ND                                                                                                          | ND                                  |
| Chlortetracycline             | Landrace x Large white Healthy                       | Antibiotic (80 mg/kg of diet) 3 weeks (post weaning) Culture      | ↑ ADG     | =           | =          | ND             | Jejunum:<br>↑ VH<br>= CD<br>↑ VH/CD ratio<br>Ileum<br>Duodenum:<br>= VH<br>= CD<br>= VH/CD ratio | Plasma:<br>= % lymphocyte CD4+ and CD8+<br>↓ [INF $\gamma$ ]<br>= [IL10] | ND                                                                                | ND                                                                                 | Cecum, Colon, Rectum:<br>= Lactobacillus                                          | ND                                                                                                          | Cecum:<br>↓ E.coli                  |
| Chlortetracycline             | Yorkshire x Landrace x Duroc Healthy                 | Antibiotic (1.5g/kg of diet) 6 weeks (post weaning) Sequencing    | =         | ND          | ND         | ND             | ND                                                                                               | ND                                                                       | = Richness, evenness and shanon index in Ileum and colon<br>= $\beta$ diversity   | ND                                                                                 | Ileum:<br>↓ Lactobacillus reuteri<br>Colon:<br>↓ Lactobacillus amylovorus         | ND                                                                                                          | ND                                  |
| Chlortetracycline + Tiamulin  | Yorkshire x Landrace Healthy                         | Antibiotic (100mg/kg of diet) 7 weeks Culture                     | ND        | ND          | ND         | ND             | ND                                                                                               | ND                                                                       | ↓ Evenness index<br>↓ $\alpha$ diversity<br>Modification of the $\beta$ diversity | Ileum:<br>↑ Firmicutes<br>Colon:<br>↑ Actinobacteria<br>Feces:<br>↓ Actinobacteria | Feces:<br>↑ Lactobacillus                                                         | ND                                                                                                          | ND                                  |
| Colistin sulphate + Enramycin | Yorkshire x Landrace x Duroc Healthy                 | Colistin (100 ppm) Enramycin (15ppm) 2 week (post weaning) RTqPCR | =         | =           | =          | =              | ND                                                                                               | Jejunum:<br>= inflammation protein expression                            | ND                                                                                | ND                                                                                 | Ileum, cecum and colon:<br>↓ Lactobacillus<br>= Enterococcus<br>= Bifidobacterium | ND                                                                                                          | Ileum, cecum:<br>↓ E.coli           |
| Tylosin phosphate             | Topics hybrid x Pietran Healthy                      | Antibiotic (100mg/kg of diet) 6 weeks (post weaning) Sequencing   | ↑ BW      | ND          | ↓ FCR      | ND             | ND                                                                                               | ND                                                                       | = $\alpha$ diversity                                                              | Cecum:<br>↑ Firmicutes<br>↓ Tenericutes                                            | ND                                                                                | Colon:<br>↑ Coprococcus<br>↑ Blautia<br>↑ Ruminococcus<br>Cecum:<br>↑ Phascolarctobacterium<br>↓ Prevotella | Cecum:<br>↓ Campylobacter           |
| Tilmicosin                    |                                                      | Antibiotic (400 mg/kg of diet) 3 weeks (post weaning) Culture     | ↑ BWG     | ↑ ADFI      | =          | ND             | Jejunum:<br>= VH<br>= CD<br>= VH/CD ratio                                                        | Blood:<br>= [IgA]<br>↑ [IgM]                                             | = shanon diversity index                                                          | ND                                                                                 | Feces:<br>= Lactobacillus                                                         | ND                                                                                                          | ND                                  |
| Amoxicillin                   | Landrace x Large white Male and Female Healthy       | Antibiotic (600 mg/kg of diet) 3 weeks (post weaning) Culture     | ↑ BWG     | ↑ ADFI      | =          | ND             | Jejunum:<br>= VH<br>= CD<br>= VH/CD ratio                                                        | Blood:<br>= [IgA]<br>↑ [IgM]                                             | = shanon diversity index                                                          | ND                                                                                 | Feces:<br>= Lactobacillus                                                         | ND                                                                                                          | ND                                  |
| Doxycycline                   |                                                      | Antibiotic (300 mg/kg of diet) 3 weeks (post weaning) Culture     | ↑ BWG     | ↑ ADFI      | =          | ND             | Jejunum:<br>= VH<br>= CD<br>= VH/CD ratio                                                        | Blood:<br>= [IgA]<br>↑ [IgM]                                             | = shanon diversity index                                                          | ND                                                                                 | Feces:<br>= Lactobacillus                                                         | ND                                                                                                          | ND                                  |

*Table S30: Effect of plants and seaweed on the phenotype and gastro-intestinal microbiota of pigs*

| Ref           | Intervention                   | Conditions                                                   | Methods                                                      | Phenotype |             |            |                                                                                                   |                                                                                                                                    |                 | Microbiota                          |                                         |           |                                                                                     |                                              |
|---------------|--------------------------------|--------------------------------------------------------------|--------------------------------------------------------------|-----------|-------------|------------|---------------------------------------------------------------------------------------------------|------------------------------------------------------------------------------------------------------------------------------------|-----------------|-------------------------------------|-----------------------------------------|-----------|-------------------------------------------------------------------------------------|----------------------------------------------|
|               |                                |                                                              |                                                              | Weight    | Food intake | FCR or FCE | Digestibility                                                                                     | Villi structure                                                                                                                    | Diversity       | Lactic acid-producing bacteria      | SCFA-producing bacteria                 | pH        | SCFA                                                                                | Pathogenic and/or Zoonotic bacteria          |
| Chen 2018     | Sangrovit®<br>Macleata cordata | Landrace x Large white x Duroc<br>Male and Female<br>Healthy | Plants (50mg/kg of diet)<br>3 weeks (post weaning)<br>RTqPCR | ↑ ADG     | ↑           | =          | ND                                                                                                | Duodenum:<br>↓ VH<br>= CD<br>= VH/CD ratio<br>Jejunum:<br>= VH<br>↓ CD<br>↑ VH/CD ratio<br>Ileum:<br>↑ VH<br>= CD<br>↑ VH/CD ratio | ND              | Ileum and Cecum:<br>↑ Lactobacillus | ND                                      | ND        | Ileum and Cecum:<br>↑ [Acetate]<br>↑ [Propionate]<br>↑ [Butyrate]<br>↑ [total SCFA] | Ileum and Cecum:<br>↓ Salmonella<br>↓ E.coli |
| Ivarsson 2012 | Chicory forage                 | Yorkshire Male and Female<br>Healthy                         | Plants (80g/kg of diet)<br>3 weeks (post birth)<br>Culture   | =         | =           | =          | ↑ Non starch polysaccharide, arabinose, xylose, uronic acid and total dietary fiber digestibility | ND                                                                                                                                 | = simpson index | Feces:<br>↓ Lactobacillus           | Feces:<br>↑ Prevotella<br>↓ Megasphaera | = (feces) | ND                                                                                  | ND                                           |
|               | Chicory root                   |                                                              |                                                              | =         | =           | =          | ↑ arabinose, uronic acid and total dietary fiber digestibility                                    | ND                                                                                                                                 | = simpson index | Feces:<br>= Lactobacillus           | Feces:<br>= Prevotella<br>= Megasphaera | ↓ (feces) | ND                                                                                  | ND                                           |
|               | Chicory forage + root          |                                                              |                                                              | =         | =           | =          | ↑ Non starch polysaccharide, arabinose, uronic acid and total dietary fiber digestibility         | ND                                                                                                                                 | = simpson index | Feces:<br>↑ Lactobacillus johnsonni | Feces:<br>= Prevotella<br>↑ Megasphaera | = (feces) | ND                                                                                  | ND                                           |

**Abbreviations:**

**BW:** Body Weight

**BWG:** Body Weight Gain

**ADG:** Average Daily Gain

**FI:** Feed Intake

**ADFI:** Average Daily Feed Intake

**FCR:** Feed Conversion Ratio

**FCE:** Feed Conversion Efficiency

**VH:** Villi Height

**CD:** Crypt Depth

= No change compared with the control group

↑ Increase compared with the control group

↓ Decrease compared with the control group

ND: Not Determined

## Bibliography

1. Biagi, G., Piva, A., Moschini, M., Vezzali, E., Roth, F.X., 2007. Performance, intestinal microflora, and wall morphology of weanling pigs fed sodium butyrate. *J. Anim. Sci.* 85, 1184–1191. <https://doi.org/10.2527/jas.2006-378>
2. Biagia, G., Cipollini, I., Paulicks, B.R., Roth, F.X., 2010. Effect of tannins on growth performance and intestinal ecosystem in weaned piglets. *Arch. Anim. Nutr.* 64, 121–135. <https://doi.org/10.1080/17450390903461584>
3. Bosi, P., Merialdi, G., Scandurra, S., Messori, S., Bardasi, L., Nisi, I., Russo, D., Casini, L., Trevisi, P., 2011. Feed supplemented with 3 different antibiotics improved food intake and decreased the activation of the humoral immune response in healthy weaned pigs but had differing effects on intestinal microbiota. *J. Anim. Sci.* 89, 4043–4053. <https://doi.org/10.2527/jas.2010-3311>
4. Broom, L.J., Miller, H.M., Kerr, K.G., Knapp, J.S., 2006. Effects of zinc oxide and *Enterococcus faecium* SF68 dietary supplementation on the performance, intestinal microbiota and immune status of weaned piglets. *Res. Vet. Sci.* 80, 45–54. <https://doi.org/10.1016/j.rvsc.2005.04.004>
5. Brousseau, J.-P., Talbot, G., Beaudoin, F., Lauzon, K., Roy, D., Lessard, M., 2015. Effects of probiotics *Pediococcus acidilactici* strain MA18/5M and *Saccharomyces cerevisiae* subsp. *boulardii* strain SB-CNCM I-1079 on fecal and intestinal microbiota of nursing and weanling piglets. *J. Anim. Sci.* 93, 5313–5326. <https://doi.org/10.2527/jas.2015-9190>
6. Chang, M., Li, Mingcong, Li, Min, Xie, Y., Li, Y., Yang, W., Gao, Z., 2021. Changes of gut microbiota in pregnant sows induced by 5-Aminolevulinic acid. *Res. Vet. Sci.* 136, 57–65. <https://doi.org/10.1016/j.rvsc.2021.01.021>
7. Chen, J., Kang, B., Zhao, Y., Yao, K., Fu, C., 2018. Effects of natural dietary supplementation with *Macleaya cordata* extract containing sanguinarine on growth performance and gut health of early-weaned piglets. *J. Anim. Physiol. Anim. Nutr.* 102, 1666–1674. <https://doi.org/10.1111/jpn.12976>
8. Choi, J.Y., Kim, J.S., Ingale, S.L., Kim, K.H., Shinde, P.L., Kwon, I.K., Chae, B.J., 2011. Effect of potential multimicrobe probiotic product processed by high drying temperature and antibiotic on performance of weanling pigs. *J. Anim. Sci.* 89, 1795–1804. <https://doi.org/10.2527/jas.2009-2794>
9. Hanczakowska, E., Szewczyk, A., Swiatkiewicz, M., Okoń, K., 2013. Short- and medium-chain fatty acids as a feed supplement for weaning and nursery pigs. *Pol. J. Vet. Sci.* 16, 647–654. <https://doi.org/10.2478/pjvs-2013-0092>
10. Heyer, C.M.E., Schmucker, S., Burbach, K., Weiss, E., Eklund, M., Aumiller, T., Capezzone, F., Steuber, J., Rodehutsord, M., Hoelzle, L.E., Seifert, J., Mosenthin, R., Stefanski, V., 2019. Phytate degradation, intestinal microbiota, microbial metabolites and immune values are changed in growing pigs fed diets with varying calcium-phosphorus concentration and fermentable substrates. *J. Anim. Physiol. Anim. Nutr.* 103, 1185–1197. <https://doi.org/10.1111/jpn.13088>
11. Hosseindoust, A.R., Lee, S.H., Kim, J.S., Choi, Y.H., Kwon, I.K., Chae, B.J., 2017. Productive performance of weanling piglets was improved by administration of a mixture of bacteriophages, targeted to control *Coliforms* and *Clostridium* spp. shedding in a challenging environment. *J. Anim. Physiol. Anim. Nutr.* 101, e98–e107. <https://doi.org/10.1111/jpn.12567>
12. Ivarsson, E., Liu, H.Y., Dicksved, J., Roos, S., Lindberg, J.E., 2012. Impact of chicory inclusion in a cereal-based diet on digestibility, organ size and faecal microbiota in growing pigs. *Anim. Int. J. Anim. Biosci.* 6, 1077–1085. <https://doi.org/10.1017/S1751731111002709>
13. Kim, M., Hosseindoust, A., Choi, Y., Lee, J., Kim, K., Kim, T., Cho, H., Kang, W., Chae, B., 2021. Effects of Hot-Melt Extruded Nano-Copper as an Alternative for the Pharmacological Dose of Copper Sulfate in Weanling Pigs. *Biol. Trace Elem. Res.* 199, 2925–2935. <https://doi.org/10.1007/s12011-020-02426-y>
14. Lan, R.X., Lee, S.I., Kim, I.H., 2016. Effects of multistrain probiotics on growth performance, nutrient digestibility, blood profiles, faecal microbial shedding, faecal score and noxious gas emission in weaning pigs. *J. Anim. Physiol. Anim. Nutr.* 100, 1130–1138. <https://doi.org/10.1111/jpn.12501>

15. Li, B., Schroyen, M., Leblois, J., Wavreille, J., Soyeurt, H., Bindelle, J., Everaert, N., 2018. Effects of inulin supplementation to piglets in the suckling period on growth performance, postileal microbial and immunological traits in the suckling period and three weeks after weaning. *Arch. Anim. Nutr.* 72, 425–442. <https://doi.org/10.1080/1745039X.2018.1508975>
16. Li, X., Wen, J., Jiao, L., Wang, C., Hong, Q., Feng, J., Hu, C., 2021. Dietary copper/zinc-loaded montmorillonite improved growth performance and intestinal barrier and changed gut microbiota in weaned piglets. *J. Anim. Physiol. Anim. Nutr.* 105, 678–686. <https://doi.org/10.1111/jpn.13522>
17. Li, Y., Han, H., Yin, J., He, X., Tang, Z., Li, T., Yao, K., Yin, Y., 2019. d- and l-Aspartate regulates growth performance, inflammation and intestinal microbial community in young pigs. *Food Funct.* 10, 1028–1037. <https://doi.org/10.1039/c8fo01410h>
18. Lo Verso, L., Talbot, G., Morissette, B., Guay, F., Matte, J.J., Farmer, C., Gong, J., Wang, Q., Bissonnette, N., Beaulieu, C., Lessard, M., 2020. The combination of nutraceuticals and functional feeds as additives modulates gut microbiota and blood markers associated with immune response and health in weanling piglets. *J. Anim. Sci.* 98, skaa208. <https://doi.org/10.1093/jas/skaa208>
19. Lv, C.H., Wang, T., Regmi, N., Chen, X., Huang, K., Liao, S.F., 2015. Effects of dietary supplementation of selenium-enriched probiotics on production performance and intestinal microbiota of weanling piglets raised under high ambient temperature. *J. Anim. Physiol. Anim. Nutr.* 99, 1161–1171. <https://doi.org/10.1111/jpn.12326>
20. Rattigan, R., Sweeney, T., Vigors, S., Rajauria, G., O'Doherty, J.V., 2020. Effects of reducing dietary crude protein concentration and supplementation with laminarin or zinc oxide on the faecal scores and colonic microbiota in newly weaned pigs. *J. Anim. Physiol. Anim. Nutr.* 104, 1471–1483. <https://doi.org/10.1111/jpn.13428>
21. Shen, Y.B., Piao, X.S., Kim, S.W., Wang, L., Liu, P., Yoon, I., Zhen, Y.G., 2009. Effects of yeast culture supplementation on growth performance, intestinal health, and immune response of nursery pigs. *J. Anim. Sci.* 87, 2614–2624. <https://doi.org/10.2527/jas.2008-1512>
22. Tan, X., Li, J., Li, Y., Li, J., Wang, Q., Fang, L., Ding, X., Huang, P., Yang, H., Yin, Y., 2019. Effect of chicken egg yolk immunoglobulins on serum biochemical profiles and intestinal bacterial populations in early-weaned piglets. *J. Anim. Physiol. Anim. Nutr.* 103, 1503–1511. <https://doi.org/10.1111/jpn.13129>
23. Tian, S., Wang, Jue, Yu, H., Wang, Jing, Zhu, W., 2019. Changes in Ileal Microbial Composition and Microbial Metabolism by an Early-Life Galacto-Oligosaccharides Intervention in a Neonatal Porcine Model. *Nutrients* 11, E1753. <https://doi.org/10.3390/nu11081753>
24. Vahjen, W., Pieper, R., Zentek, J., 2011. Increased dietary zinc oxide changes the bacterial core and enterobacterial composition in the ileum of piglets. *J. Anim. Sci.* 89, 2430–2439. <https://doi.org/10.2527/jas.2010-3270>
25. Wang, Q., Sun, Q., Qi, R., Wang, J., Qiu, X., Liu, Z., Huang, J., 2019. Effects of *Lactobacillus plantarum* on the intestinal morphology, intestinal barrier function and microbiota composition of suckling piglets. *J. Anim. Physiol. Anim. Nutr.* 103, 1908–1918. <https://doi.org/10.1111/jpn.13198>
26. Wang, W., Van Noten, N., Degroote, J., Romeo, A., Vermeir, P., Michiels, J., 2019. Effect of zinc oxide sources and dosages on gut microbiota and integrity of weaned piglets. *J. Anim. Physiol. Anim. Nutr.* 103, 231–241. <https://doi.org/10.1111/jpn.12999>
27. Wang, Y.B., Du, W., Fu, A.K., Zhang, X.P., Huang, Y., Lee, K.H., Yu, K., Li, W.F., Li, Y.L., 2016. Intestinal microbiota and oral administration of *Enterococcus faecium* associated with the growth performance of new-born piglets. *Benef. Microbes* 7, 529–538. <https://doi.org/10.3920/BM2015.0099>
28. Wu, J., Xiong, Y., Zhong, M., Li, Y., Wan, H., Wu, D., Liu, Q., 2020. Effects of purified fibre-mixture supplementation of gestation diet on gut microbiota, immunity and reproductive performance of sows. *J. Anim. Physiol. Anim. Nutr.* 104, 1144–1154. <https://doi.org/10.1111/jpn.13287>
29. Wu, Y., Liu, W., Li, Q., Li, Y., Yan, Y., Huang, F., Wu, X., Zhou, Q., Shu, X., Ruan, Z., 2018. Dietary chlorogenic acid regulates gut microbiota, serum-free amino acids and colonic serotonin levels in growing pigs. *Int. J. Food Sci. Nutr.* 69, 566–573. <https://doi.org/10.1080/09637486.2017.1394449>

30. Xu, C.C., Yang, S.F., Zhu, L.H., Cai, X., Sheng, Y.S., Zhu, S.W., Xu, J.X., 2014. Regulation of N-acetyl cysteine on gut redox status and major microbiota in weaned piglets. *J. Anim. Sci.* 92, 1504–1511. <https://doi.org/10.2527/jas.2013-6755>
31. Yan, H., Lu, H., Almeida, V.V., Ward, M.G., Adeola, O., Nakatsu, C.H., Ajuwon, K.M., 2017. Effects of dietary resistant starch content on metabolic status, milk composition, and microbial profiling in lactating sows and on offspring performance. *J. Anim. Physiol. Anim. Nutr.* 101, 190–200. <https://doi.org/10.1111/jpn.12440>
32. Yan, H., Yu, B., Degroote, J., Spranghers, T., Van Noten, N., Majdeddin, M., Van Poucke, M., Peelman, L., De Vrieze, J., Boon, N., Gielen, I., Smet, S.D., Chen, D., Michiels, J., 2020. Antibiotic affects the gut microbiota composition and expression of genes related to lipid metabolism and myofiber types in skeletal muscle of piglets. *BMC Vet. Res.* 16, 392. <https://doi.org/10.1186/s12917-020-02592-0>
