# Supplementary material for: Effects of Major Families of Modulators on Performances and Gastrointestinal Microbiota of Poultry, Pigs and Ruminants: A Systematic Approach
Source: Microorganisms. 2023 May 31;11(6):1464. doi: 10.3390/microorganisms11061464 (PMC10300821; doi:10.3390/microorganisms11061464)
Supplement: Supplementary file 1 [file microorganisms-11-01464-s001.zip › Supplementary Data S3.pdf]

# Supplemental Data S3: Effect of Modulators on Intestinal Microbiota and Phenotype of Ruminants

*Table S31: Effect of antibiotics on the phenotype and gastro-intestinal microbiota of ruminants*

| Ref          | Intervention                                          | Conditions                     | Methods                                                                                                                                                                         | Phenotype |                | Diversity      | Microbiota         |                                |                                   |
|--------------|-------------------------------------------------------|--------------------------------|---------------------------------------------------------------------------------------------------------------------------------------------------------------------------------|-----------|----------------|----------------|--------------------|--------------------------------|-----------------------------------|
|              |                                                       |                                |                                                                                                                                                                                 | Weight    | Diarrhoea rate |                | Phylum             | Lactic acid-producing bacteria | SCFA-producing bacteria           |
| Kim 2021     | Neomycin                                              | Calf Male and Female Diarrheic | Antibiotic 7 weeks Sequencing                                                                                                                                                   | ↑ BW      | =              | = β diversity  | ND                 | Feces: ↑ Lactobacillus         | Feces: ↓ Akkermansia ↑ Prevotella |
| Pereira 2018 | Ceftiofur, Penicillin, Ampicillin and Oxytetracycline | Bos Taurus Male Healthy        | Antibiotic (0.01µg/ml of ampicillin sodium, 0.1µg/ml of ceftiofur sodium, 0.005µg/ml of penicillin G sodium, and 0.3 µg/ml of oxytetracycline hydrochloride) 5 weeks Sequencing | ND        | ND             | = shanon index | = phylum abundance | ND                             | ND                                |

*Table S32: Effect of transplantation on the phenotype and gastro-intestinal microbiota of ruminants*

| Ref      | Intervention                         | Conditions                     | Methods                                                  | Phenotype |             |            |                | Immunity                                                 | Microbiota                                |                         |                                |                                                 |
|----------|--------------------------------------|--------------------------------|----------------------------------------------------------|-----------|-------------|------------|----------------|----------------------------------------------------------|-------------------------------------------|-------------------------|--------------------------------|-------------------------------------------------|
|          |                                      |                                |                                                          | Weight    | Food intake | FCR or FCE | Diarrhoea rate |                                                          | Diversity                                 | Phylum                  | Lactic acid-producing bacteria | SCFA-producing bacteria                         |
| Kim 2021 | Fecal microbiota from healthy calves | Calf Male and Female Diarrheic | Transplantation (5g of feces) 7 weeks Sequencing         | ↑ BW      | ND          | ND         | ↓              | ND                                                       | Modification of the β-diversity           | ND                      | Feces: ↑ Lactobacillus         | Feces: ↓ Akkermansia ↑ Prevotella ↑ Bacteroides |
| Yin 2021 | Rumen fluid from 3 months old sheep  | Sheep Female Healthy           | Transplantation (25mL of rumen fluid) 6 weeks Sequencing | ↓ ADG     | ↓ ADFI      | =          | ND             | Serum: = [Ig] = [Antioxydant protein] ↑ [IL-6]           | = α-diversity = β-diversity               | Feces: ↓ Proteobacteria | ND                             | ND                                              |
|          | Rumen fluid from 1 year old sheep    |                                |                                                          | ↓ ADG     | =           | =          | ND             | Serum: = [Antioxydant protein] ↑ [IgA] ↑ [IL-6] ↑ [INFα] | = α-diversity Modification of β-diversity | Feces: ↓ Actinobacteria | ND                             | ND                                              |

*Table S33: Effect of various interventions on the phenotype and gastro-intestinal microbiota of ruminants*

| Ref                 | Intervention | Conditions              | Methods                                                    | Phenotype |             |            | Microbiota                                          |                    |                                                    |                                     |
|---------------------|--------------|-------------------------|------------------------------------------------------------|-----------|-------------|------------|-----------------------------------------------------|--------------------|----------------------------------------------------|-------------------------------------|
|                     |              |                         |                                                            | Weight    | Food intake | FCR or FCE | Diversity                                           | Phylum             | Lactic acid-producing bacteria                     | Pathogenic and/or Zoonotic bacteria |
| Hromadkova 2020     | Colostrum    | Holstein Healthy        | Colostrum (50% of milk) 72H RTqPCR                         | ND        | ND          | ND         | ND                                                  | ND                 | Ileum and Colon: = Lactobacillus = Bifidobacterium | Ileum and Colon: = E.coli           |
|                     |              |                         | Colostrum (100%) 72H RTqPCR                                | ND        | ND          | ND         | ND                                                  | ND                 | Ileum and Colon: ↑ Lactobacillus = Bifidobacterium | Colon: ↑ E.coli                     |
| Wickramasinghe 2020 | Water        | Holstein Female Healthy | Water available from day 0 (vs day 17) 10 weeks Sequencing | ND        | ND          | ND         | = shanon, simpson, ACE and Chao index = β diversity | = phylum abundance | ND                                                 | ND                                  |

#### Abbreviations:

*BW: Body Weight*

*BWG: Body Weight Gain*

*ADG: Average Daily Gain*

*FCR: Feed Conversion Ratio*

*= No change compared with the control group*

*↑ Increase compared with the control group*

*↓ Decrease compared with the control group*

*ND: Not Determined*

#### Bibliography:

1. Hromádková, J., Suzuki, Y., Pletts, S., Pyo, J., Ma, T., Chen, Y., Steele, M.A., Guan, L.L., 2020. Effect of colostrum feeding strategies on the expression of neuroendocrine genes and active gut mucosa-attached bacterial populations in neonatal calves. *J. Dairy Sci.* 103, 8629–8642. <https://doi.org/10.3168/jds.2019-17710>
2. Kim, H.S., Whon, T.W., Sung, H., Jeong, Y.-S., Jung, E.S., Shin, N.-R., Hyun, D.-W., Kim, P.S., Lee, J.-Y., Lee, C.H., Bae, J.-W., 2021. Longitudinal evaluation of fecal microbiota transplantation for ameliorating calf diarrhea and improving growth performance. *Nat. Commun.* 12, 161. <https://doi.org/10.1038/s41467-020-20389-5>
3. Pereira, R.V.V., Carroll, L.M., Lima, S., Foditsch, C., Siler, J.D., Bicalho, R.C., Warnick, L.D., 2018. Impacts of feeding preweaned calves milk containing drug residues on the functional profile of the fecal microbiota. *Sci. Rep.* 8, 554. <https://doi.org/10.1038/s41598-017-19021-2>
4. Wickramasinghe, H.K.J.P., Anast, J.M., Schmitz-Esser, S., Serão, N.V.L., Appuhamy, J. a. D.R.N., 2020. Beginning to offer drinking water at birth increases the species richness and the abundance of *Faecalibacterium* and *Bifidobacterium* in the gut of preweaned dairy calves. *J. Dairy Sci.* 103, 4262–4274. <https://doi.org/10.3168/jds.2019-17258>
5. Yin, X., Ji, S., Duan, C., Ju, S., Zhang, Y., Yan, H., Liu, Y., 2021. Rumen fluid transplantation affects growth performance of weaned lambs by altering gastrointestinal microbiota, immune function and feed digestibility. *Anim. Int. J. Anim. Biosci.* 15, 100076. <https://doi.org/10.1016/j.animal.2020.100076>
